# Supplementary material for: Association between frailty, chronic conditions and socioeconomic status in community-dwelling older adults attending primary care: a cross-sectional study using practice-based research network data
Source: PubMed Central journal article supplement — BMJ Open. 2023 Feb 21;13(2):e066269. doi: 10.1136/bmjopen-2022-066269 (PMC9944661; doi:10.1136/bmjopen-2022-066269), 2023-02-21
Supplement: bmjopen-2022-066269.draft_revisions.pdf [file bmjopen-2022-066269.draft_revisions.pdf]

# BMJ Open

BMJ Open is committed to open peer review. As part of this commitment we make the peer review history of every article we publish publicly available.

When an article is published we post the peer reviewers' comments and the authors' responses online. We also post the versions of the paper that were used during peer review. These are the versions that the peer review comments apply to.

The versions of the paper that follow are the versions that were submitted during the peer review process. They are not the versions of record or the final published versions. They should not be cited or distributed as the published version of this manuscript.

BMJ Open is an open access journal and the full, final, typeset and author-corrected version of record of the manuscript is available on our site with no access controls, subscription charges or pay-per-view fees (<http://bmjopen.bmj.com>).

If you have any questions on BMJ Open's open peer review process please email [info.bmjopen@bmj.com](mailto:info.bmjopen@bmj.com)

# BMJ Open

## Association between frailty, chronic conditions and socio-economic status in community-dwelling older adults attending primary care: A cross-sectional study using practice-based research network data

|                               |                                                                                                                                                                                                                                                                                                                                                                                                                                                                                                                           |
|-------------------------------|---------------------------------------------------------------------------------------------------------------------------------------------------------------------------------------------------------------------------------------------------------------------------------------------------------------------------------------------------------------------------------------------------------------------------------------------------------------------------------------------------------------------------|
| Journal:                      | <i>BMJ Open</i>                                                                                                                                                                                                                                                                                                                                                                                                                                                                                                           |
| Manuscript ID                 | bmjopen-2022-066269                                                                                                                                                                                                                                                                                                                                                                                                                                                                                                       |
| Article Type:                 | Original research                                                                                                                                                                                                                                                                                                                                                                                                                                                                                                         |
| Date Submitted by the Author: | 18-Jul-2022                                                                                                                                                                                                                                                                                                                                                                                                                                                                                                               |
| Complete List of Authors:     | Mangin, Dee; Hamilton<br>Lawson, Jennifer; McMaster University Faculty of Health Sciences, Department of Family Medicine<br>Risdon, Cathy; McMaster University Faculty of Health Sciences, Family Medicine;<br>Siu, Henry ; McMaster University Faculty of Health Sciences,<br>Packer, Tamar; Hamilton Health Sciences and St. Joseph's Health Care<br>Wong, Sabrina T.; University of British Columbia, Centre for Health Services and Policy Research<br>Howard, Michelle; McMaster University, Dept of Family Medicine |
| Keywords:                     | PRIMARY CARE, EPIDEMIOLOGY, Information management < BIOTECHNOLOGY & BIOINFORMATICS                                                                                                                                                                                                                                                                                                                                                                                                                                       |
|                               |                                                                                                                                                                                                                                                                                                                                                                                                                                                                                                                           |

SCHOLARONE™  
Manuscripts

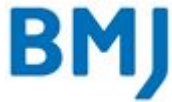

I, the Submitting Author has the right to grant and does grant on behalf of all authors of the Work (as defined in the below author licence), an exclusive licence and/or a non-exclusive licence for contributions from authors who are: i) UK Crown employees; ii) where BMJ has agreed a CC-BY licence shall apply, and/or iii) in accordance with the terms applicable for US Federal Government officers or employees acting as part of their official duties; on a worldwide, perpetual, irrevocable, royalty-free basis to BMJ Publishing Group Ltd ("BMJ") its licensees and where the relevant Journal is co-owned by BMJ to the co-owners of the Journal, to publish the Work in this journal and any other BMJ products and to exploit all rights, as set out in our [licence](#).

The Submitting Author accepts and understands that any supply made under these terms is made by BMJ to the Submitting Author unless you are acting as an employee on behalf of your employer or a postgraduate student of an affiliated institution which is paying any applicable article publishing charge ("APC") for Open Access articles. Where the Submitting Author wishes to make the Work available on an Open Access basis (and intends to pay the relevant APC), the terms of reuse of such Open Access shall be governed by a Creative Commons licence – details of these licences and which [Creative Commons](#) licence will apply to this Work are set out in our licence referred to above.

Other than as permitted in any relevant BMJ Author's Self Archiving Policies, I confirm this Work has not been accepted for publication elsewhere, is not being considered for publication elsewhere and does not duplicate material already published. I confirm all authors consent to publication of this Work and authorise the granting of this licence.

1  
2  
3 **Association between frailty, chronic conditions and socio-economic status in**  
4  
5  
6 **community-dwelling older adults attending primary care: A cross-sectional**  
7  
8  
9 **study using practice-based research network data**  
10  
11  
12  
13

14 Mangin D (MBChB (Otago), DPH (Otago), FRNZCGP (NZ))<sup>1</sup>

15  
16 [mangind@mcmaster.ca](mailto:mangind@mcmaster.ca)  
17

18  
19 ORCID: 0000-0003-2149-9376  
20  
21  
22  
23

24 Lawson J (MLIS, MSc health candidate)<sup>1</sup>

25  
26 [hollj@mcmaster.ca](mailto:hollj@mcmaster.ca)  
27

28  
29 ORCID: 0000-0002-8122-9768  
30  
31  
32  
33

34 Risdon C (MD, Dman, CCFP, FCFP)<sup>1</sup>

35  
36 [risdonc@mcmaster.ca](mailto:risdonc@mcmaster.ca)  
37

38  
39 ORCID: 0000-0001-9024-1438  
40  
41  
42  
43

44 Siu H (MSc, MD, CCFP (COE), FCFP)<sup>1</sup>

45  
46 [siuh3@mcmaster.ca](mailto:siuh3@mcmaster.ca)  
47

48  
49 ORCID: 0000-0002-1593-6827  
50  
51  
52

53 Packer T (BSc, MD, FCFP)<sup>2</sup>

54  
55 [tpacker@stjosham.on.ca](mailto:tpacker@stjosham.on.ca)  
56  
57  
58  
59  
60

1  
2  
3 ORCID:0000-0003-4403-829X  
4  
5

6  
7  
8 Wong ST (RN, PhD)<sup>3</sup>  
9

10 [sabrina.wong@ubc.ca](mailto:sabrina.wong@ubc.ca)  
11

12 ORCID: 0000-0002-9619-9012  
13  
14

15  
16  
17  
18 Howard M (BA(Hons), MSc, PhD)<sup>1</sup>  
19

20 [mhoward@mcmaster.ca](mailto:mhoward@mcmaster.ca)  
21

22 ORCID: 0000-0001-8127-5492  
23  
24  
25  
26  
27  
28  
29

30 <sup>1</sup> Department of Family Medicine, McMaster University, Hamilton, Ontario, Canada  
31

32 <sup>2</sup> Chief, Departments of Family Medicine, Hamilton Health Sciences and St. Joseph's Healthcare,  
33

34 Primary Care Lead, Hamilton, Ontario, Canada  
35  
36

37 <sup>3</sup> Centre for Health Services and Policy Research, School of Nursing, University of British  
38

39 Columbia, Vancouver, British Columbia, Canada  
40  
41  
42  
43  
44

45 Corresponding Author:  
46

47 Dr. Dee Mangin  
48

49 David Braley Health Sciences Centre, McMaster University  
50

51 100 Main Street West, 5<sup>th</sup> floor  
52  
53

54 Hamilton, Ontario  
55  
56  
57  
58  
59  
60

1  
2  
3 L8P 1H6  
4

5  
6 Email: [mangind@mcmaster.ca](mailto:mangind@mcmaster.ca)  
7

8 Phone: 905-525-9140 ext. 21219  
9

10 Fax: 905-527-4440  
11  
12  
13  
14

15 Prior Presentation:  
16

17 Lawson, J. Frailty Patterns in Community Dwelling Older Adults Attending Primary Care: A  
18 Quantitative Analysis of Practice Based Research Network Data. Trillium PHC V Conference,  
19 Ontario. October, 2020.  
20  
21  
22  
23  
24  
25  
26  
27

28 Word count for the main text (excluding title page, abstract, references, tables, figures, conflict  
29 of interest): 2696  
30  
31  
32  
33  
34

35 This manuscript contains:  
36

37 2 Figures  
38

39 2 Tables  
40

41 1 Appendix  
42  
43  
44  
45

## 46 Abstract: 47 48 49

50 **Objectives:** Frailty is a multidimensional syndrome of loss of reserves in energy, physical ability,  
51 cognition, and general health. Frail patients are more susceptible to adverse health outcomes  
52  
53  
54  
55  
56  
57  
58  
59  
60

1  
2  
3 and acute health system use. This study examined associations between level of frailty and  
4  
5 chronic conditions and socioeconomic status.  
6  
7

8  
9 **Design:** cross-sectional cohort study  
10

11  
12 **Setting:** The MUSIC Network is a PBRN in Hamilton, Ontario, composed of 55 family physicians  
13  
14 providing care to 38,000 patients who represent a broad cross section of patients. MUSIC hosts  
15  
16 a regularly updated, deidentified, longitudinal database containing primary care practice data.  
17  
18  
19

20  
21  
22 **Participants:** Patients aged 65 years or older, rostered to one of 37 family physicians at 2  
23  
24 clinical sites within the MUSIC Network and with a recent clinical encounter.  
25  
26

27  
28 **Intervention:** MUSIC Network physicians assigned a frailty score to patients using the nine-  
29  
30 point Clinical Frailty Scale (CFS). We linked frailty scores to chronic conditions and  
31  
32 neighbourhood-level socioeconomic status to examine associations between these domains.  
33  
34  
35

36  
37 **Results:** Among the 2043 patients assessed, the prevalence of low (scoring 1-3), medium  
38  
39 (scoring 4-6) and high frailty (scoring 7-9) was 55.9%, 40.3% and 3.8% respectively. The  
40  
41 prevalence of five or more chronic diseases was 11% among low, 26% among medium and 44%  
42  
43 among high frailty groups ( $\chi^2 = 137.92$ , DoF 2,  $<0.001$ ). More disabling conditions appeared in  
44  
45 the top 50% of conditions in the highest frailty group compared to the low and medium groups.  
46  
47 Increasing frailty was significantly associated with lower neighbourhood income ( $\chi^2 = 61.42$ ,  
48  
49 DoF 8  $p < 0.001$ ) and higher neighbourhood material deprivation  $\chi^2 = 55.24$  Dof 8,  $p < 0.001$ ).  
50  
51  
52  
53  
54  
55  
56  
57  
58  
59  
60

1  
2  
3 **Conclusion:** There appears to be a triple disadvantage of disease burden, frailty, and  
4  
5 socioeconomic disadvantage. This knowledge, as well as specific disease patterns, can support a  
6  
7 health equity approach in planning health care for older adults within primary care.  
8  
9

## 10 11 12 13 14 15 Article Summary

### 16 17 Strengths and limitations of this study

#### 18 19 Strengths

- 20  
21 • The CFS frailty scores were completed for 77% of eligible patients supporting the  
22  
23 feasibility and ease of use of the tool within primary care
- 24  
25 • Data collection for our analyses draws on 3 data types: prospective collected frailty  
26  
27 scores, MUSIC Network database for patient recruitment and disease conditions and  
28  
29 socioeconomic data sourced from the Canadian Census data  
30  
31

#### 32 33 34 Weaknesses

- 35  
36 • This study is cross-sectional therefore we cannot deduce the direction of causation of  
37  
38 the associations between socio-economic status, multimorbidity and level of frailty
- 39  
40 • We used neighbourhood-level income and deprivation status in the absence of directly  
41  
42 collected, patient-level socio-economic status which is not collected in the Primary Care  
43  
44 EMR record
- 45  
46 • We limited the cohort to patients for whom a single dissemination area (DA) code mapped to  
47  
48 their postal code and those with a recent encounter for whom the clinician had enough  
49  
50 knowledge to complete a CFS, but do not expect this to affect the associations found.  
51  
52  
53  
54  
55  
56  
57  
58  
59  
60



## Keywords:

Frailty

Multimorbidity

Chronic Disease

Socioeconomic Status

Social Deprivation

Health Equity

Primary Care

## Abbreviations:

MUSIC: McMaster University Sentinel and Information Collaboration

PBRN: Practice-based Research Network

CFS: Clinical Frailty Scale©

PCCF: Postal Code Conversion File<sup>OM</sup>

CHASS: Computing in the Humanities and Social Sciences

DA: Dissemination area

## Introduction:

Frailty is considered a multidimensional syndrome of loss of reserves in energy, physical ability, cognition, and general health. There are approximately 1.6 million people in Canada living with frailty.<sup>1</sup> Frail patients are complex and more susceptible to adverse health outcomes compared to non-frail people of the same chronological age.<sup>2</sup> Left unchecked, frail patients experience diminished quality of life, high risk for hospitalization and long-term care admission and increased mortality.<sup>3-5</sup> Primary care plays a central role in management, coordination and prevention as the medical home for patients<sup>6</sup> with a key role in identifying and managing frailty.<sup>7,8</sup>

While frailty is not fully explained by the presence of specific health conditions, a large proportion of people experiencing frailty also have multiple chronic medical conditions (multimorbidity).<sup>9-11</sup> Multimorbidity negatively affects patient-important outcomes like disability, social participation, and self-rated physical and mental health and it contributes to care burden<sup>12,13</sup>, and the need for acute care services<sup>11</sup>. The combination of frailty and multimorbidity is likely to exacerbate their respective load of associative issues.

Low socioeconomic status is associated with multimorbidity, health risks, poorer prognoses, and challenges in accessing equitable care.<sup>14-17</sup> Lower socioeconomic status also reduces access to primary care<sup>15,18</sup>. The addition of a socioeconomic lens on the multimorbid and frail population can help focus effective interventions and distribute resources more effectively. In primary care, the longitudinal comprehensive primary care framework can be leveraged with

1  
2  
3 clinicians identifying their frail patients, guiding them to appropriate goal-directed care, and  
4  
5 helping them to proactively manage their complex health and social needs.  
6  
7

8  
9 Reliable screening tools for frailty are easy to use in primary care settings.<sup>19,20</sup> Identification of  
10  
11 prefrail and frail patients in primary care creates the opportunity to develop targeted  
12  
13 interventions that address quality of life, burden of unnecessary treatment, and assess  
14  
15 barriers.<sup>2,3,21-23</sup> Such approaches are likely to improve the individual patient's health and  
16  
17 experience of equitably delivered health care and ameliorate resource utilization. Planning and  
18  
19 evaluating programs in primary care designed to meet the needs of all frail older adults would  
20  
21 be better guided with an understanding of how chronic disease patterns and social factors  
22  
23 (socioeconomic status) intersect and are patterned across prefrail and frail states.<sup>21</sup> We found  
24  
25 little evidence that examined the intersection of frailty, multimorbidity and socioeconomic  
26  
27 status, and with this study, we sought to explore their relationship.  
28  
29  
30  
31  
32  
33

34 We hypothesized that patients with a greater number of chronic conditions, especially disabling  
35  
36 conditions, and with lower socioeconomic status would be more likely to have a higher clinical  
37  
38 frailty score. Our aim was to describe the distribution of frailty among older adult patients in  
39  
40 primary care, and to describe association between chronic conditions, socioeconomic status  
41  
42 and frailty.  
43  
44  
45  
46  
47

## 48 Methods

49  
50

51 We conducted a cross-sectional study of a cohort of older adults, created using electronic  
52  
53 medical records from a primary care practice-based research network (PBRN). Clinical frailty  
54  
55  
56  
57  
58  
59  
60

1  
2  
3 assessments and neighbourhood-level income and deprivation data were linked to the patient's  
4  
5 clinical data available from their electronic medical records.  
6  
7

## 8 9 Setting

10  
11 The MUSIC Network is a PBRN in Hamilton, Ontario, Canada. Data holdings include a regularly  
12  
13 updated, deidentified, longitudinal database containing primary care practice data. There are  
14  
15 55 family physicians associated with the MUSIC Network. This study was based on a sub-set of  
16  
17 the 37 physicians in the MUSIC PBRN, who's previously described 38,000 patients represent a  
18  
19 broad cross section of patients.<sup>24,25</sup>  
20  
21  
22  
23

## 24 Participants

25  
26 Patients aged 65 years or older, currently rostered (as of Jan2020) to family physicians of the  
27  
28 MUSIC network subgroup described above, were eligible to be included in the cohort.  
29  
30

## 31 Patient and Public Involvement

32  
33  
34 None  
35

## 36 Data Collection and Preparation

### 37 Frailty Score Assignment

38  
39  
40 The Clinical Frailty Scale© (CFS) is a frailty screening tool that applies clinical judgement for  
41  
42 scoring personal capacity, independence related to fitness and self-management of health. It  
43  
44 can be reliably used to predict outcomes of mortality, comorbidity, functional, decline, mobility,  
45  
46 and cognitive decline. The CFS features a clinically validated 9-point scale ranging from 1 (very  
47  
48 fit) to 9 (terminally ill) with scores of  $\geq 5$  indicating a frail state.<sup>19,26</sup> With low administration  
49  
50 time (less than 1 minute per patient assessment) and low cost, the CFS has seen high utility  
51  
52  
53  
54  
55  
56  
57  
58  
59  
60

1  
2  
3 across many clinical practice domains<sup>19,27,28</sup>. The CFS has good inter-rater agreement between  
4  
5 physicians and multidisciplinary teams and correlates well with other frailty scoring  
6  
7 instruments.<sup>27,28</sup>  
8  
9

10  
11 The participating physicians' EMR was used to identify rostered patients over the age of 65 and  
12  
13 who had attended a clinical encounter within the last 12 months. The family physicians were  
14  
15 provided with a list of eligible patients in their care, accompanied by the CFS scoring guide  
16  
17 (Appendix A). Physicians were asked to complete frailty assessments (selecting a CFS score  
18  
19 between 1-9) of patients whom they felt confident that they could assess based on their overall  
20  
21 knowledge of the patient. There were no specific exclusion criteria.  
22  
23  
24

25  
26  
27 Scored lists were collected from each provider and securely entered within a research  
28  
29 database, replacing all patient identifiers with the MUSIC patient ID. Scores were completed for  
30  
31 77% of eligible patients.  
32  
33  
34

### 35 Cohort Creation and Data Linkage

36  
37 The final cohort for this study included 2043 patients whose physician had assessed their frailty  
38  
39 level and who had: 1) a postal code in Hamilton that could accurately be linked to  
40  
41 neighbourhood-level information (described below) and 2) accessible disease diagnoses  
42  
43 through the MUSIC-PBRN database.  
44  
45  
46

47  
48 To capture conditions, we used the ICD9 disease codes which are recorded by physicians, within  
49  
50 the disease registry module of the EMR. Coded conditions include disorders such as COPD and  
51  
52 heart failure as well as risk factors such as hypertension and dyslipidemia. Condition codes  
53  
54 considered to be similar (i.e., variations of the same base condition) were grouped, for  
55  
56  
57  
58  
59

1  
2  
3 example, Dementia (ICD9 290) and Alzheimers (ICD9 331.0) to form meaningful groupings for  
4  
5  
6 frequency analysis.  
7

8  
9 We used the Postal Code<sup>OM</sup> Conversion File (PCCF), complementary to the 2016 Canadian  
10  
11 Census,<sup>29</sup> to translate patients' postal codes to the geographic census unit of dissemination  
12  
13 area. A dissemination area (DA) is a small geographic census area composed of one or more  
14  
15 neighbouring blocks, with a population of 400 to 700 persons.<sup>29</sup> In this, the cohort was limited  
16  
17 to only patients having a 1:1 mapping between their postal code and matching DA to facilitate a  
18  
19 simple and direct means of linking dissemination area to socioeconomic status data.  
20  
21  
22

23  
24 The Canadian Socio-Economic Information Management System database was accessed via the  
25  
26 Computing in the Humanities and Social Sciences (CHASS) Canadian Census Analyser<sup>30</sup> to  
27  
28 retrieve economic family after-tax income decile group data<sup>31</sup>. Economic family after-tax  
29  
30 neighbourhood income decile groups can provide a rough ranking of an individual's relative  
31  
32 economic position. These income decile data were organized by dissemination area (DA)  
33  
34 geographical units. We calculated the median decile for each DA unit represented in our cohort  
35  
36 and linked this value to each patient via the postal code to DA map. We further collapsed the  
37  
38 decile groups into quintiles to achieve reasonable category sizes for statistical analysis.  
39  
40  
41  
42  
43

44  
45 A second set of socioeconomic data from the Ontario Marginalization Index<sup>32</sup> was also linked to  
46  
47 the dataset using the same postal code to DA translation. The index provides a measure of  
48  
49 material deprivation, an estimate of the inability for individuals and communities to access and  
50  
51  
52  
53  
54  
55  
56  
57  
58  
59  
60

1  
2  
3 attain basic material needs using indicators of income, quality of housing, educational  
4  
5 attainment, and family structure characteristics.  
6  
7

## 8 Data Analysis 9

10 We described the distribution of patient demographic characteristics, frailty, chronic  
11  
12 conditions, and SES variables using simple descriptive analyses (means, median, frequencies  
13  
14 and proportions, as appropriate). A review of the distribution of the CFS scores showed some  
15  
16 score categories had very small numbers, therefore, for analysis purposes,  
17  
18 we further grouped the cohort's frailty scores as low (scored 1-3), medium (scored 4-6), and  
19  
20 high (scored 7-9).  
21  
22  
23  
24  
25  
26  
27

28 We examined bivariate associations between frailty and other patient characteristics  
29  
30 (demographics, multimorbidity and SES). Age was categorized as 65-69, 70-74, 75-79, 80-84,  
31  
32 85-89 and > 90 years. Male and female captured sex groupings. Income quintiles included  
33  
34 scores of 1 (lowest income) to 5 (highest income). Material deprivation quintiles included  
35  
36 groupings of 1 (least deprived) to 5 (most deprived). The number of chronic conditions  
37  
38 (disorders and risk factors) were grouped as 0, 1, 2-4, 5+ and categorized having 1 or more  
39  
40 conditions versus none.  
41  
42  
43  
44  
45  
46  
47

48 We examined associations using Chi-square, and ANOVA as appropriate. Statistical significance  
49  
50 was set at  $\alpha < 0.05$  (two-tailed). The data were analyzed using IBM SPSS Statistics (Version  
51  
52 28) predictive analytics software.  
53  
54  
55  
56  
57  
58  
59  
60

1  
2  
3 The study was approved by the Hamilton Integrated Research Ethics Board (HiREB No. 10683).  
4  
5

## 6 7 Results

### 8 9 Demographics

10  
11 The mean age of the patients (n= 2043) was 76 years (as of Feb 2020) and 60.5% (1235/2043)  
12  
13 were female. Two-thirds of the patients (63.5%, 1296/2043) had two or more chronic  
14  
15 conditions.  
16  
17

### 18 19 Frailty Distribution

20  
21 Figure 1 shows the frailty distribution over all 9 CFS categories with a slightly skewed  
22  
23 distribution with fewer patients in the frailest categories and the highest proportion of patients  
24  
25 scored as 3.  
26  
27

### 28 29 Median Income Distribution

30  
31 Figure 2 shows the full distribution of median economic family after-tax income deciles (1 as  
32  
33 lowest income decile, 10 as highest income decile). There was a near-normal distribution with  
34  
35 the highest proportion of patients in decile 6. Grouping deciles into quintiles with 1 designated  
36  
37 as lower income and 5 as higher income, most patients were in the middle quintile (3) (38.3%)  
38  
39 with the smallest proportions in the lowest (5.1%) and highest income (4.5%) quintiles (Table  
40  
41  
42  
43  
44  
45 1).  
46  
47  
48  
49  
50  
51  
52  
53  
54  
55  
56  
57  
58  
59  
60



**Table 1: Associations between frailty score and demographic characteristics, deprivation indicators and multimorbidity (N=2,043).**

| Characteristic                             | Overall     | Low Frailty,<br>n (%) | Medium Frailty,<br>n (%) | High Frailty,<br>n (%) | P-value             |
|--------------------------------------------|-------------|-----------------------|--------------------------|------------------------|---------------------|
| Frailty group                              | 2,043       | 1,141 (55.9)          | 824 (40.3)               | 78 (3.8)               |                     |
| <b>Demographics</b>                        |             |                       |                          |                        |                     |
| Mean Age (SD)                              | 76 (7.8)    | 73.3 (5.9)            | 79.1 (8.2)               | 85.2 (9.0)             | <0.001 <sup>a</sup> |
| Median Age (Range)                         | 74 (65-103) | 72 (65-99)            | 78 (65-103)              | 86 (66-102)            | <0.001 <sup>b</sup> |
| Age grouping                               |             |                       |                          |                        |                     |
| 65-69                                      | 589 (29)    | 440 (39)              | 143 (17)                 | 6 (8)                  | <0.001 <sup>c</sup> |
| 70-74                                      | 540 (26)    | 355 (31)              | 176 (21)                 | 9 (12)                 |                     |
| 75-79                                      | 374 (18)    | 210 (18)              | 156 (19)                 | 8 (10)                 |                     |
| 80-84                                      | 247 (12)    | 84 (7)                | 148 (18)                 | 15 (19)                |                     |
| 85-89                                      | 173 (9)     | 40 (4)                | 120 (15)                 | 13 (17)                |                     |
| > 90 y                                     | 120 (6)     | 12 (1)                | 81 (10)                  | 27 (35)                |                     |
| Female, n (%)                              | 1236 (61)   | 647 (57)              | 535 (65)                 | 54 (69)                | <0.001 <sup>c</sup> |
| Male, n (%)                                | 807 (40)    | 494 (43)              | 289 (35)                 | 24 (31)                |                     |
| <b>Median income quintile <sup>d</sup></b> |             |                       |                          |                        |                     |
| 1 (low)                                    | 104 (5)     | 35 (3)                | 65 (8)                   | 4 (5)                  | <0.001 <sup>c</sup> |
| 2                                          | 545 (27)    | 269 (24)              | 250 (30)                 | 26 (33)                |                     |
| 3                                          | 783 (38)    | 429 (38)              | 324 (39)                 | 30 (39)                |                     |
| 4                                          | 520 (26)    | 348 (31)              | 157 (19)                 | 15 (19)                |                     |
| 5 (high)                                   | 91 (5)      | 60 (5)                | 28 (3)                   | 3 (4)                  |                     |
| <b>Deprivation quintile <sup>e</sup></b>   |             |                       |                          |                        |                     |
| 1 (least deprived)                         | 411 (20)    | 286 (25)              | 113 (14)                 | 12 (15)                | <0.001 <sup>c</sup> |
| 2                                          | 302 (15)    | 182 (16)              | 106 (13)                 | 14 (18)                |                     |
| 3                                          | 348 (17)    | 179 (16)              | 156 (19)                 | 13 (17)                |                     |
| 4                                          | 530 (26)    | 277 (24)              | 228 (28)                 | 25 (32)                |                     |
| 5 (most deprived)                          | 452 (22)    | 217 (19)              | 221 (27)                 | 14 (18)                |                     |
| <b>Multimorbidity <sup>f</sup></b>         |             |                       |                          |                        |                     |
| No. chronic conditions <sup>f</sup>        |             |                       |                          |                        |                     |
| 0                                          | 338 (17)    | 261 (23)              | 73 (9)                   | 4 (5)                  |                     |
| 1+                                         | 1,705 (84)  | 880 (77)              | 751 (91)                 | 74 (95)                | <0.001 <sup>c</sup> |
| 1                                          | 409 (20)    | 267 (23)              | 133 (16)                 | 9 (12)                 | <0.001 <sup>c</sup> |
| 2-4                                        | 923 (45)    | 487 (43)              | 405 (49)                 | 31 (40)                |                     |
| 5+                                         | 373 (18)    | 126 (11)              | 213 (26)                 | 34 (44)                |                     |

<sup>a</sup> *P* value from ANOVA test

<sup>b</sup> *P* value from Kruskal-Wallis test

<sup>c</sup> *P* value from  $\chi^2$  test for categorical data

<sup>d</sup> Mean value of Economic family after-tax income decile group data at dissemination area level, based on Statistics Canada 2016 Census data.

<sup>e</sup> Deprivation score categories from the Ontario Marginalization Index at dissemination area level

<sup>f</sup> Chronic disorders and risk factor conditions coded by physicians with ICD9

## Associations between Frailty Level, and Demographic Characteristics Socioeconomic Status and Multimorbidity

Mean age ascended across frailty groups at 73 years in the low frailty group, 78 years in the medium frailty group and 85 years in the high frailty group (ANOVA,  $F = 231.62$ , DoF 2,  $p < 0.0001$ ) (Table 1). The proportion of patients who were female increased across low, medium and high frailty groups (57%, 65%, 69% respectively) ( $\chi^2 = 16.12$ ,  $df = 3$ ,  $p < 0.001$ ).

The distribution of income quintiles was significantly different across the frailty groups ( $\chi^2 = 61.42$ ,  $df = 8$ ,  $p < 0.001$ ). There is some trend of moderate and higher frailty patients associated with lower income quintiles compared to patients with low frailty. (Table 1).

There were significant differences in proportions of patients in different frailty groups across the material deprivation quintile groupings ( $\chi^2 = 55.243$ ,  $df = 8$ ,  $p < 0.001$ ). Table 1 also shows certain trending of the higher frailty group associated with greater deprivation, compared to the moderate and low frailty groups that show less deprivation.

1  
2  
3 Patients with higher frailty were more likely to have at least one coded condition (95%, 91%  
4 and 77% in the high, medium and low frailty groupings, respectively ( $\chi^2 = 75.7254$ , DoF 2,  $p$   
5  $<0.0001$ ). Furthermore, the accumulation of chronic disease (1, 2-4 or 5+ conditions) differed  
6 across frailty groups ( $\chi^2 = 169.6$  Dof 6,  $p <0.001$ ). The data show a trend of more multimorbidity  
7 burden in the high frail group (12%, 40%, 44% for 1, 2-3 and 5+ conditions), whereas the low  
8 frailty and medium frailty groups showed higher proportions in the 2-4 conditions category  
9 (43% and 49% for low frailty and medium frailty, respectively) ( $p <0.001$ ).  
10  
11  
12  
13  
14  
15  
16  
17  
18  
19  
20  
21

### 22 Chronic Conditions Patterns

23  
24 Table 2 shows the most frequent chronic conditions and risk factors (e.g., hypertension and  
25 hyperlipidemia) in each frailty grouping. A core set of high frequency conditions composed at  
26 least 50% of all conditions in all three frailty groups but more conditions were included in the  
27 top 50% as frailty increased. In the low frailty group, 5 conditions composing the risk factors  
28 hypertension and hyperlipidemia and the disorders diabetes, osteoarthritis/joint pain, and  
29 depression - unipolar) comprised 52% of their conditions. These 5 conditions persisted in the  
30 medium frailty group with the addition of 2 more conditions (back, neck pain and sciatica and  
31 cardiac dysrhythmia) composing 51% of conditions. In the high-scored frailty group, 9  
32 conditions comprised 52% of the conditions, with dementia/Alzheimers, congestive heart  
33 failure and acute and chronic coronary artery disease (CAD) appearing uniquely and displacing  
34 back, neck pain and sciatica. Among other burdensome disease, chronic obstructive pulmonary  
35 disease was a relatively common condition in the high and medium frailty groups (falling within  
36  
37  
38  
39  
40  
41  
42  
43  
44  
45  
46  
47  
48  
49  
50  
51  
52  
53  
54  
55  
56  
57  
58  
59  
60

54% of all conditions for both) and but less so in the low frailty group (falling within the top 70% of all conditions).

**Table 2: Array and Proportion of Conditions (Disorders and Risk Factors<sup>c</sup>) in each Frailty Grouping among the 2043 primary care patients**

| Frailty Score 1-3                            | Proportion of Grouping Diagnoses | Frailty Score 4-6                            | Proportion of Grouping Diagnoses | Frailty Score 7-9                            | Proportion of Grouping Diagnoses |
|----------------------------------------------|----------------------------------|----------------------------------------------|----------------------------------|----------------------------------------------|----------------------------------|
| Hypertension <sup>c</sup>                    | 19%                              | Hypertension <sup>c</sup>                    | 14.9%                            | Hypertension <sup>c</sup>                    | 11.8%                            |
| Diabetes                                     | 12%                              | Diabetes                                     | 9.7%                             | Osteoarthritis and Joint Pain                | 7.3%                             |
| Hyperlipidemia/<br>Dyslipidemia <sup>c</sup> | 8.3%                             | Osteoarthritis and Joint Pain                | 7.7%                             | Diabetes                                     | 6.4%                             |
| Osteoarthritis and Joint Pain                | 7.2%                             | Hyperlipidemia/<br>Dyslipidemia <sup>c</sup> | 5.8%                             | Dementia/<br>Alzheimers <sup>b</sup>         | 5.6%                             |
| Depression (unipolar)                        | 5.9%                             | Depression (unipolar)                        | 5.5%                             | Cardiac Dysrhythmia                          | 5.6%                             |
|                                              |                                  | Back, Neck Pain and Sciatica <sup>a</sup>    | 4%                               | Depression                                   | 4.5%                             |
|                                              |                                  | Cardiac Dysrhythmia <sup>a</sup>             | 3.3%                             | Congestive Heart Failure <sup>b</sup>        | 3.6%                             |
|                                              |                                  |                                              |                                  | Hyperlipidemia/<br>Dyslipidemia <sup>c</sup> | 3.4%                             |
|                                              |                                  |                                              |                                  | Acute and Chronic CAD <sup>b</sup>           | 3.40%                            |
| <b>Total proportion</b>                      | <b>52.3%</b>                     |                                              | <b>50.7%</b>                     |                                              | <b>51.5%</b>                     |

<sup>a</sup> first appears in medium frailty group

<sup>b</sup> first appears in high frailty group

<sup>c</sup> Risk Factors type among conditions

## Discussion

In this study of older adult patients in primary care, almost half of the patients evaluated by their family physician had a moderate or high level of frailty. Higher frailty level was associated with older age, being female and having more chronic conditions, especially life-limiting or

1  
2  
3 disabling conditions such as cardiovascular diseases and dementia. Higher frailty level was also  
4  
5 associated with indicators of lower socio-economic status.  
6  
7

8  
9 The usability of the CFS in primary care was evidenced in our study with frailty scores  
10  
11 completed for 77% of eligible patients. This directly collected data was a strength of the study,  
12  
13 as was the study setting within a practice based research network where disease coding in the  
14  
15 EMR has been strengthened through previous initiatives.<sup>24</sup>  
16  
17

18  
19 The cohort showed a near normal distribution across high, medium, and low frailty groups, with  
20  
21 the most common scores lying in the middle quintile. As expected in a community dwelling  
22  
23 cohort, there were fewer older adults in the most-frail group as these patients are more likely  
24  
25 to need long-term care accommodation supports.<sup>4</sup>  
26  
27

28  
29 We have identified the most common conditions that affect the older adult primary care  
30  
31 population and have demonstrated how this pattern shifts across categories of increasing  
32  
33 frailty. Furthermore, in those experiencing high frailty conditions, substantial and life-limiting  
34  
35 morbidity appear more commonly, and so does burdensome management requirements,  
36  
37 greater risk for hospitalization, and lowered quality of life.<sup>11-13,33</sup>  
38  
39  
40  
41  
42  
43

44  
45 We found that living in neighbourhoods of lower income and higher social material deprivation  
46  
47 was more common among patients with moderate and high frailty. These differences have  
48  
49 important implications at population level and may reflect large numbers of patients at risk for  
50  
51 negative health outcomes. Socio-economic disadvantages may be compounded by costs  
52  
53  
54  
55  
56  
57  
58  
59  
60

1  
2  
3 associated with living with frailty (e.g., need for mobility aids) in addition to the costs of  
4  
5 managing the individual health conditions.<sup>5,11</sup>  
6  
7

## 8 9 Limitations

10  
11 The study design is cross-sectional therefore we cannot deduce the direction of causation of  
12  
13 the associations between socio-economic status, multimorbidity and level of frailty.  
14  
15

16  
17 Information on individual socio-economic status is not routinely collected in primary care. We  
18  
19 have assumed neighbourhood-level income and deprivation status provide reasonable accuracy  
20  
21 with respect to the actual socioeconomic status of individual patients within our frailty cohort.  
22  
23 Neighbourhood-level information on indicators such as income may not reflect actual wealth  
24  
25 among older adults who are more likely to have left the workforce due to retirement.  
26  
27  
28  
29  
30

31  
32 We limited the cohort to patients for whom a single dissemination area (DA) code mapped to  
33  
34 their postal code. This affects sample size but there is no reason to think it would affect the  
35  
36 associations found. Similarly, the limitation of the cohort to those with a recent encounter for  
37  
38 whom the clinician had enough knowledge to complete a CFS should not affect the associations  
39  
40 seen.  
41  
42  
43  
44  
45  
46  
47  
48  
49  
50  
51  
52  
53  
54  
55  
56  
57  
58  
59  
60

## Conclusions

Awareness of the triple disadvantage of disease burden, frailty, and socioeconomic disadvantage, as well as specific disease patterns can support a health equity approach to care for older adults within primary care.

The confluence of health and social disadvantage and increasing frailty highlights the need for targeted health and social care approaches for achieving improved health equity. Our findings also underscore the need to anticipate required healthcare services and to use finite resources most effectively. Grounding these requirements in primary care is highly appropriate as evidence shows primary care is a strong mechanism for reducing health inequity, fostering access to comprehensive longitudinal care as well as targeted clinical and program innovations that are effective in reducing modifiable health inequity.<sup>34</sup>

## Contributorship Statement

Substantial contributions to the conception or design of the work: DM, JL, MH Acquisition of data: DM, JL Analysis or interpretation of data for the work: DM, JL, MH Drafting the work or revising it critically for important intellectual content; All Authors. Final approval of the version to be published: All Authors. Agreement to be accountable for all aspects of the work in ensuring that questions related to the accuracy or integrity of any part of the work are appropriately investigated and resolved: All Authors. DM is the guarantor.

## Acknowledgements

The authors would like to thank the primary care clinicians and patients of the MUSIC PBRN who contribute their data to the MUSIC Network through which the study data were generated for this project. We also acknowledge Krzysztof Adamczyk, the information technology lead for the MUSIC network and Vivek Jadon from McMaster Libraries for guidance to Statistics Canada data and Jennifer Salerno for statistical support. We thank Kathy De Caire, Kati Ivanyi, Doug Oliver, and Jill Berridge for their executive support in the implementation of this project. We acknowledge the support of the McMaster University Department of Family Medicine for this PBRN. We recognize the work of the Canadian Primary Care Sentinel Surveillance Network partnering with the Canadian Frailty Network in the original implementation of the CFS across many of its networks.

## Competing Interest

All authors have completed the ICMJE uniform disclosure form at <http://www.icmje.org/disclosure-of-interest/> and declare: no support from any organisation for the submitted work; no financial relationships with any organisations that might have an interest in the submitted work in the previous three years; no other relationships or activities that could appear to have influenced the submitted work.

## Funding

This work was supported by the INSPIRE-PHC Program, Applied Health Research Question, Ontario Ministry of Health, grant number 6023175, Total Funding: \$31,680.



## Data Sharing Statement

The dataset is available by contact with the corresponding author Dr. Dee Mangin

[mangind@mcmaster.ca](mailto:mangind@mcmaster.ca).

## Ethics

The study was approved by the Hamilton Integrated Research Ethics Board (HiREB No. 10683).

Patient consent was waived as this study applied deidentified retrospective data.

## References

1. Frailty matters. Canadian Frailty Network. <https://www.cfn-nce.ca/frailty-matters/>. Accessed January 13, 2022.
2. Lacas A, Rockwood K. Frailty in primary care: a review of its conceptualization and implications for practice. *BMC medicine*. 2012;10:4.
3. Crocker TF, Brown L, Clegg A, et al. Quality of life is substantially worse for community-dwelling older people living with frailty: systematic review and meta-analysis. *Qual Life Res*. 2019;28(8):2041-2056.
4. Kojima G. Frailty as a predictor of nursing home placement among community-dwelling older adults: A systematic review and meta-analysis. *J Geriatr Phys Ther*. 2018;41(1):42-48.
5. Kojima G. Increased healthcare costs associated with frailty among community-dwelling older people: A systematic review and meta-analysis. *Arch Gerontol Geriatr*. 2019;84:103898.

- 1  
2  
3 6. Bodenheimer T, Pham HH. Primary care: current problems and proposed solutions. *Health*  
4  
5 *Aff (Millwood)*. 2010;29(5):799-805.  
6  
7
- 8 7. Andrew MK, Dupuis-Blanchard S, Maxwell C, et al. Social and societal implications of frailty,  
9  
10 including impact on Canadian healthcare systems. *J Frailty Aging*. 2018;7(4):217-223.  
11  
12
- 13 8. Serra-Prat M, Sist X, Domenich R, et al. Effectiveness of an intervention to prevent frailty in  
14  
15 pre-frail community-dwelling older people consulting in primary care: a randomised  
16  
17 controlled trial. *Age and ageing*. 2017;46(3):401-407.  
18  
19
- 20 9. Yarnall AJ, Sayer AA, Clegg A, Rockwood K, Parker S, Hindle JV. New horizons in  
21  
22 multimorbidity in older adults. *Age and ageing*. 2017;46(6):882-888.  
23  
24
- 25 10. Vetrano DL, Palmer K, Marengoni A, et al. Frailty and multimorbidity: a systematic review  
26  
27 and meta-analysis. *J Gerontol A Biol Sci Med Sci*. 2019;74(5):659-666.  
28  
29
- 30 11. Wolff JL, Starfield B, Anderson G. Prevalence, expenditures, and complications of multiple  
31  
32 chronic conditions in the elderly. *Arch Intern Med*. 2002;162(20):2269-2276.  
33  
34
- 35 12. Griffith LE, Gilsing A, Mangin D, et al. Multimorbidity frameworks impact prevalence and  
36  
37 relationships with patient-important outcomes. *J Am Geriatr Soc*. 2019;67(8):1632-1640.  
38  
39
- 40 13. Fortin M, Dubois MF, Hudon C, Soubhi H, Almirall J. Multimorbidity and quality of life: a  
41  
42 closer look. *Health Qual Life Outcomes*. 2007;5:52.  
43  
44
- 45 14. Mercer SW, Watt GC. The inverse care law: clinical primary care encounters in deprived and  
46  
47 affluent areas of Scotland. *Ann Fam Med*. 2007;5(6):503-510.  
48  
49
- 50 15. Mercer SW, Zhou Y, Humphris GM, et al. Multimorbidity and Socioeconomic Deprivation in  
51  
52 Primary Care Consultations. *Ann Fam Med*. 2018;16(2):127-131.  
53  
54  
55  
56  
57  
58  
59  
60

16. Dahrouge S, Hogg W, Muggah E, Schrecker T. Equity of primary care service delivery for low income "sicker" adults across 10 OECD countries. *Int J Equity Health*. 2018;17(1):182.
17. Salisbury C, Johnson L, Purdy S, Valderas JM, Montgomery AA. Epidemiology and impact of multimorbidity in primary care: a retrospective cohort study. *Br J Gen Pract*. 2011;61(582):e12-21.
18. O'Brien R, Wyke S, Guthrie B, Watt G, Mercer S. An 'endless struggle': a qualitative study of general practitioners' and practice nurses' experiences of managing multimorbidity in socio-economically deprived areas of Scotland. *Chronic Illn*. 2011;7(1):45-59.
19. Rockwood K, Song X, MacKnight C, et al. A global clinical measure of fitness and frailty in elderly people. *CMAJ*. 2005;173(5):489-495.
20. Thandi M, Wong ST, Aponte-Hao S, et al. Strategies for working across Canadian practice-based research and learning networks (PBRLNs) in primary care: focus on frailty. *BMC Fam Pract*. 2021;22(1):220.
21. Lee L, Heckman G, Molnar FJ. Frailty: Identifying elderly patients at high risk of poor outcomes. *Can Fam Physician*. 2015;61(3):227-231.
22. Theou O, Park GH, Garm A, Song X, Clarke B, Rockwood K. Reversing frailty levels in primary care using the CARES model. *Can Geriatr J*. 2017;20(3):105-111.
23. Lawson B, Sampalli T, Warner G, et al. Improving Care for the frail in Nova Scotia: an implementation evaluation of a frailty portal in primary care practice. *Int J Health Policy Manag*. 2019;8(2):112-123.

- 1  
2  
3 24. Mangin D, Lawson J, Adamczyk K, Guenter D. Embedding "smart" disease coding within  
4  
5 routine electronic medical record workflow: prospective single-arm trial. *JMIR Med Inform.*  
6  
7 2020;8(7):e 16764.  
8  
9  
10 25. Mangin D, Lawson J, Cuppage J, et al. Legacy drug-prescribing patterns in primary care. *Ann*  
11  
12 *Fam Med.* 2018;16(6):515-520.  
13  
14  
15 26. Rockwood K, Theou O. Using the clinical frailty scale in allocating scarce health care  
16  
17 resources. *Can Geriatr J.* 2020;23(3):210-215.  
18  
19  
20 27. Church S, Rogers E, Rockwood K, Theou O. A scoping review of the clinical frailty scale. *BMC*  
21  
22 *Geriatr.* 2020;20(1):393.  
23  
24  
25 28. Oviedo-Briones M, Laso AR, Carnicero JA, et al. A comparison of frailty assessment  
26  
27 instruments in different clinical and social care settings: the frailtools project. *J Am Med Dir*  
28  
29 *Assoc.* 2021;22(3):607 e607-607 e612.  
30  
31  
32 29. Statistics Canada. Postal Code<sup>OM</sup> Conversion File (PCCF), Reference Guide.  
33  
34 <https://www150.statcan.gc.ca/n1/pub/92-154-g/92-154-g2017001-eng.htm>. Accessed:  
35  
36 March 10, 2020.  
37  
38  
39 30. University of Toronto. CHASS Canadian Census Analyser.  
40  
41 <http://dc1.chass.utoronto.ca/census/index.html>. Accessed: March 12, 2020.  
42  
43  
44 31. Statistics Canada. Dictionary, Census of Population, 2016 - Economic family after-tax income  
45  
46 decile group. [https://www12.statcan.gc.ca/census-recensement/2016/ref/dict/pop166-](https://www12.statcan.gc.ca/census-recensement/2016/ref/dict/pop166-eng.cfm)  
47  
48 [eng.cfm](https://www12.statcan.gc.ca/census-recensement/2016/ref/dict/pop166-eng.cfm). Accessed September 13, 2020.  
49  
50  
51  
52  
53  
54  
55  
56  
57  
58  
59  
60

- 1  
2  
3 32. Matheson FI, van Ingen T. 2016 Ontario marginalization index. Toronto, ON: St. Michael's  
4  
5 Hospital; 2018. Joint publication with Public Health Ontario. Megari K. Quality of life in  
6  
7 chronic disease patients. *Health Psychol Res.* 2013;1(3):e27.  
8  
9  
10  
11 33. Megari K. Quality of Life in Chronic Disease Patients. *Health Psychol Res.* 2013;1(3):e27.  
12  
13  
14 34. Starfield B, Gervas J, Mangin D. Clinical care and health disparities. *Annu Rev Public Health.*  
15  
16 2012;33:89-106.

1  
2  
3  
4  
5  
6  
7  
8  
9  
10  
11  
12  
13  
14  
15  
16  
17  
18  
19  
20  
21  
22  
23  
24  
25  
26  
27  
28  
29  
30  
31  
32  
33  
34  
35  
36  
37  
38  
39  
40  
41  
42  
43  
44  
45  
46  
47  
48  
49  
50  
51  
52  
53  
54  
55  
56  
57  
58  
59  
60

For peer review only

Figure 1: Frailty Score<sup>a</sup> Distribution among the 2043 primary care patients

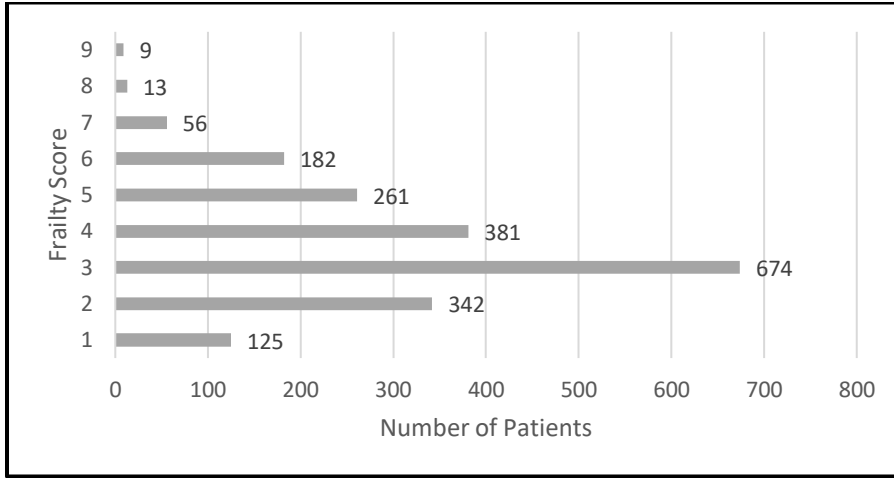

<sup>a</sup> Frailty scored on a 9-point scale ranging from 1 (very fit) to 9 (terminally ill) with scores of  $\geq 5$  indicating a frail state. <sup>19,26</sup>

peer review only

Figure 2: Median Family After-Tax Neighbourhood Income Decile<sup>a</sup> Distribution among the 2043

Patients

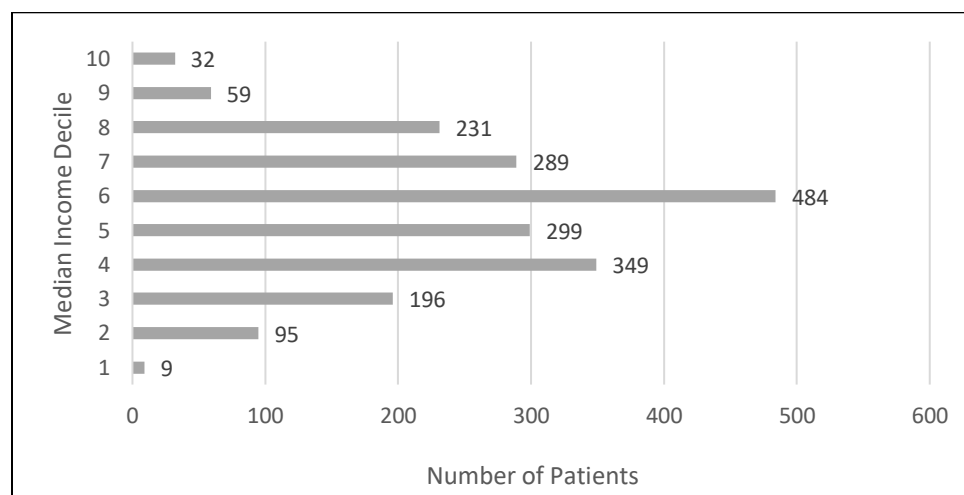

<sup>a</sup> Median economic family after-tax income decile (1 as lowest income decile, 10 as highest income decile).



## Appendix A: The Clinical Frailty Scale©

### Clinical Frailty Scale\*

**1 Very Fit** – People who are robust, active, energetic and motivated. These people commonly exercise regularly. They are among the fittest for their age.

**2 Well** – People who have **no active disease symptoms** but are less fit than category 1. Often, they exercise or are very **active occasionally**, e.g. seasonally.

**3 Managing Well** – People whose **medical problems are well controlled**, but are **not regularly active** beyond routine walking.

**4 Vulnerable** – While **not dependent** on others for daily help, often **symptoms limit activities**. A common complaint is being “slowed up”, and/or being tired during the day.

**5 Mildly Frail** – These people often have **more evident slowing**, and need help in **high order IADLs** (finances, transportation, heavy housework, medications). Typically, mild frailty progressively impairs shopping and walking outside alone, meal preparation and housework.

**6 Moderately Frail** – People need help with **all outside activities** and with **keeping house**. Inside, they often have problems with stairs and need **help with bathing** and might need minimal assistance (cuing, standby) with dressing.

**7 Severely Frail** – **Completely dependent for personal care**, from whatever cause (physical or cognitive). Even so, they seem stable and not at high risk of dying (within ~ 6 months).

**8 Very Severely Frail** – Completely dependent, approaching the end of life. Typically, they could not recover even from a minor illness.

**9. Terminally Ill** - Approaching the end of life. This category applies to people with a **life expectancy <6 months**, who are **not otherwise evidently frail**.

**Scoring frailty in people with dementia**

The degree of frailty corresponds to the degree of dementia. Common **symptoms in mild dementia** include forgetting the details of a recent event, though still remembering the event itself, repeating the same question/story and social withdrawal.

In **moderate dementia**, recent memory is very impaired, even though they seemingly can remember their past life events well. They can do personal care with prompting.

In **severe dementia**, they cannot do personal care without help.

\* 1. Canadian Study on Health & Aging, Revised 2008.  
2. K. Rockwood et al. A global clinical measure of fitness and frailty in elderly people. CMAJ 2005;173:489-495.

## STROBE Statement—checklist of items that should be included in reports of observational studies

|                           | <b>Item No.</b> | <b>Recommendation</b>                                                                               | <b>Page No.</b> | <b>Relevant text from manuscript</b>                                                                                                                                                                                                                                                                                                                                                                                                                                                                                                                                                                                                                                                                 |
|---------------------------|-----------------|-----------------------------------------------------------------------------------------------------|-----------------|------------------------------------------------------------------------------------------------------------------------------------------------------------------------------------------------------------------------------------------------------------------------------------------------------------------------------------------------------------------------------------------------------------------------------------------------------------------------------------------------------------------------------------------------------------------------------------------------------------------------------------------------------------------------------------------------------|
| <b>Title and abstract</b> | 1               | (a) Indicate the study's design with a commonly used term in the title or the abstract              | 4               | a cross-sectional study of a cohort                                                                                                                                                                                                                                                                                                                                                                                                                                                                                                                                                                                                                                                                  |
|                           |                 | (b) Provide in the abstract an informative and balanced summary of what was done and what was found | 4               | done                                                                                                                                                                                                                                                                                                                                                                                                                                                                                                                                                                                                                                                                                                 |
| <b>Introduction</b>       |                 |                                                                                                     | 6-7             |                                                                                                                                                                                                                                                                                                                                                                                                                                                                                                                                                                                                                                                                                                      |
| Background/rationale      | 2               | Explain the scientific background and rationale for the investigation being reported                | 6-7             | <p>... a large proportion of people experiencing frailty also have multimorbidity</p> <p>... Low socioeconomic status is associated with multimorbidity, health risks, poorer prognoses, and challenges in accessing equitable care.</p> <p>... Reliable screening tools for frailty are easy to use in primary care</p> <p>... Planning and evaluating programs in primary care designed to meet the needs of all frail older adults would be better guided with an understanding of how chronic disease patterns and social factors (socioeconomic status) intersect and are patterned across prefrail and frail states.</p> <p>... We found little evidence that examined the intersection of</p> |

1  
2  
3  
4  
5  
6  
7  
8  
9  
10  
11  
12  
13  
14  
15  
16  
17  
18  
19  
20  
21  
22  
23  
24  
25  
26  
27  
28  
29  
30  
31  
32  
33  
34  
35  
36  
37  
38  
39  
40  
41  
42  
43  
44  
45  
46

For peer review only

|                |   |                                                                                                  |   |                                                                                                                                                                                                                                                                                                                                                                                                         |
|----------------|---|--------------------------------------------------------------------------------------------------|---|---------------------------------------------------------------------------------------------------------------------------------------------------------------------------------------------------------------------------------------------------------------------------------------------------------------------------------------------------------------------------------------------------------|
|                |   |                                                                                                  |   | frailty, multimorbidity and socioeconomic status, and with this study, we sought to explore their relationship.                                                                                                                                                                                                                                                                                         |
| Objectives     | 3 | State specific objectives, including any prespecified hypotheses                                 | 7 | We hypothesized that patients with a greater number of chronic conditions, especially disabling conditions, and with lower socioeconomic status would be more likely to have a higher clinical frailty score. Our aim was to describe the distribution of frailty among older adult patients in primary care, and to describe association between chronic conditions, socioeconomic status and frailty. |
| <b>Methods</b> |   |                                                                                                  |   |                                                                                                                                                                                                                                                                                                                                                                                                         |
| Study design   | 4 | Present key elements of study design early in the paper                                          | 8 | We conducted a cross-sectional study of a cohort of older adults, created using electronic medical records from a primary care practice-based research network (PBRN). Clinical frailty assessments and neighbourhood income and deprivation data were linked to the patient’s clinical data available from their electronic medical records.                                                           |
| Setting        | 5 | Describe the setting, locations, and relevant dates, including periods of recruitment, exposure, | 8 | The MUSIC Network is a                                                                                                                                                                                                                                                                                                                                                                                  |

|                              |    |                                                                                                                                                                                                                                                                                                                                                                                                                                                                                                                                                                                                                                                                                                                    |       |                                                                                                                                                                                                                                                                                                                                              |
|------------------------------|----|--------------------------------------------------------------------------------------------------------------------------------------------------------------------------------------------------------------------------------------------------------------------------------------------------------------------------------------------------------------------------------------------------------------------------------------------------------------------------------------------------------------------------------------------------------------------------------------------------------------------------------------------------------------------------------------------------------------------|-------|----------------------------------------------------------------------------------------------------------------------------------------------------------------------------------------------------------------------------------------------------------------------------------------------------------------------------------------------|
|                              |    | follow-up, and data collection                                                                                                                                                                                                                                                                                                                                                                                                                                                                                                                                                                                                                                                                                     |       | PBRN in Hamilton, Ontario, Canada. Data holdings include a regularly updated, deidentified, longitudinal database containing primary care practice data. Patients aged 65 years or older, currently rostered (as of Jan2020) to family physicians of the MUSIC network subgroup described above, were eligible to be included in the cohort. |
| Participants                 | 6  | <p>(a) <i>Cohort study</i>—Give the eligibility criteria, and the sources and methods of selection of participants. Describe methods of follow-up</p> <p><i>Case-control study</i>—Give the eligibility criteria, and the sources and methods of case ascertainment and control selection. Give the rationale for the choice of cases and controls</p> <p><i>Cross-sectional study</i>—Give the eligibility criteria, and the sources and methods of selection of participants</p> <p>(b) <i>Cohort study</i>—For matched studies, give matching criteria and number of exposed and unexposed</p> <p><i>Case-control study</i>—For matched studies, give matching criteria and the number of controls per case</p> | 9     | The participating physicians' EMR was used to identify rostered patients over the age of 65 and who had attended a clinical encounter within the last 12 months.                                                                                                                                                                             |
| Variables                    | 7  | Clearly define all outcomes, exposures, predictors, potential confounders, and effect modifiers. Give diagnostic criteria, if applicable                                                                                                                                                                                                                                                                                                                                                                                                                                                                                                                                                                           | 11    | Variables include frailty score, socioeconomic status (income and deprivation score) and level of multimorbidity                                                                                                                                                                                                                             |
| Data sources/<br>measurement | 8* | For each variable of interest, give sources of data and details of methods of assessment (measurement). Describe comparability of assessment methods if there is more than one group                                                                                                                                                                                                                                                                                                                                                                                                                                                                                                                               | 11-12 | We described the distribution of patient demographic characteristics, frailty, chronic conditions, and SES variables using simple descriptive                                                                                                                                                                                                |

1  
2  
3  
4  
5  
6  
7  
8  
9  
10  
11  
12  
13  
14  
15  
16  
17  
18  
19  
20  
21  
22  
23  
24  
25  
26  
27  
28  
29  
30  
31  
32  
33  
34  
35  
36  
37  
38  
39  
40  
41  
42  
43  
44  
45  
46

For peer review only

analyses (means, median, frequencies and proportions, as appropriate)... We examined bivariate associations between frailty and other patient characteristics (demographics, multimorbidity and SES).

|      |   |                                                           |   |                                                                                                                                                                                                        |
|------|---|-----------------------------------------------------------|---|--------------------------------------------------------------------------------------------------------------------------------------------------------------------------------------------------------|
| Bias | 9 | Describe any efforts to address potential sources of bias | 9 | Physicians were asked to complete frailty assessments (selecting a CFS score between 1-9) of patients whom they felt confident that they could assess based on their overall knowledge of the patient. |
|------|---|-----------------------------------------------------------|---|--------------------------------------------------------------------------------------------------------------------------------------------------------------------------------------------------------|

|            |    |                                           |   |                                                                                                                                                                                                                                                                                                             |
|------------|----|-------------------------------------------|---|-------------------------------------------------------------------------------------------------------------------------------------------------------------------------------------------------------------------------------------------------------------------------------------------------------------|
| Study size | 10 | Explain how the study size was arrived at | 9 | The final cohort for this study included 2043 patients whose physician had assessed their frailty level and who had: 1) a postal code in Hamilton that could accurately be linked to neighbourhood level information (described below) and 2) accessible disease diagnoses through the MUSIC-PBRN database. |
|------------|----|-------------------------------------------|---|-------------------------------------------------------------------------------------------------------------------------------------------------------------------------------------------------------------------------------------------------------------------------------------------------------------|

Continued on next page

|                                                                                                                                                                                     |                        |    |                                                                                                                              |    |                                                                                                                                                                                                                                                                                                                                                                                                                                                                                                                                                                                                                                                                                                                                                                                                                                     |
|-------------------------------------------------------------------------------------------------------------------------------------------------------------------------------------|------------------------|----|------------------------------------------------------------------------------------------------------------------------------|----|-------------------------------------------------------------------------------------------------------------------------------------------------------------------------------------------------------------------------------------------------------------------------------------------------------------------------------------------------------------------------------------------------------------------------------------------------------------------------------------------------------------------------------------------------------------------------------------------------------------------------------------------------------------------------------------------------------------------------------------------------------------------------------------------------------------------------------------|
| 1<br>2<br>3<br>4<br>5<br>6<br>7<br>8<br>9<br>10<br>11<br>12<br>13<br>14<br>15<br>16<br>17<br>18<br>19<br>20<br>21<br>22<br>23<br>24<br>25<br>26<br>27<br>28<br>29<br>30<br>31<br>32 | Quantitative variables | 11 | Explain how quantitative variables were handled in the analyses. If applicable, describe which groupings were chosen and why | 11 | A review of the distribution of the CFS scores showed some score categories had very small numbers, therefore, for analysis purposes, we further grouped the cohort's frailty scores as low (scored 1-3), medium (scored 4-6), and high (scored 7-9). We examined bivariate associations between frailty and other patient characteristics (demographics, multimorbidity and SES). Age was categorized as 65-69, 70-74, 75-79, 80-84, 85-89 and > 90 years. Male and female captured sex groupings. Income quintiles included scores of 1 (lowest income) to 5 (highest income). Material deprivation quintiles included groupings of 1 (least deprived) to 5 (most deprived). The number of chronic conditions (disorders and risk factors) were grouped as 0, 1, 2-4, 5+ and categorized having 1 or more conditions versus none. |
| 33<br>34<br>35<br>36<br>37<br>38<br>39<br>40<br>41<br>42                                                                                                                            | Statistical methods    | 12 | (a) Describe all statistical methods, including those used to control for confounding                                        | 12 | We examined associations using Chi-square, and ANOVA as appropriate. Statistical significance was set at $\alpha < 0.05$ (two-tailed). The data were analyzed using IBM SPSS Statistics (Version 28) predictive analytics software.                                                                                                                                                                                                                                                                                                                                                                                                                                                                                                                                                                                                 |

|                  |     |                                                                                                                                                                                                   |           |                                                                                                                                                                                                                                                                                                             |
|------------------|-----|---------------------------------------------------------------------------------------------------------------------------------------------------------------------------------------------------|-----------|-------------------------------------------------------------------------------------------------------------------------------------------------------------------------------------------------------------------------------------------------------------------------------------------------------------|
|                  |     | (b) Describe any methods used to examine subgroups and interactions                                                                                                                               |           | Not applicable                                                                                                                                                                                                                                                                                              |
|                  |     | (c) Explain how missing data were addressed                                                                                                                                                       |           | Not applicable                                                                                                                                                                                                                                                                                              |
|                  |     | (d) <i>Cohort study</i> —If applicable, explain how loss to follow-up was addressed                                                                                                               |           |                                                                                                                                                                                                                                                                                                             |
|                  |     | <i>Case-control study</i> —If applicable, explain how matching of cases and controls was addressed                                                                                                |           |                                                                                                                                                                                                                                                                                                             |
|                  |     | <i>Cross-sectional study</i> —If applicable, describe analytical methods taking account of sampling strategy                                                                                      |           |                                                                                                                                                                                                                                                                                                             |
|                  |     | (e) Describe any sensitivity analyses                                                                                                                                                             |           | Not applicable                                                                                                                                                                                                                                                                                              |
| <b>Results</b>   |     |                                                                                                                                                                                                   |           |                                                                                                                                                                                                                                                                                                             |
| Participants     | 13* | (a) Report numbers of individuals at each stage of study—eg numbers potentially eligible, examined for eligibility, confirmed eligible, included in the study, completing follow-up, and analysed | 9         | The final cohort for this study included 2043 patients whose physician had assessed their frailty level and who had: 1) a postal code in Hamilton that could accurately be linked to neighbourhood level information (described below) and 2) accessible disease diagnoses through the MUSIC-PBRN database. |
|                  |     | (b) Give reasons for non-participation at each stage                                                                                                                                              |           | Provided above                                                                                                                                                                                                                                                                                              |
|                  |     | (c) Consider use of a flow diagram                                                                                                                                                                |           | Described textually                                                                                                                                                                                                                                                                                         |
| Descriptive data | 14* | (a) Give characteristics of study participants (eg demographic, clinical, social) and information on exposures and potential confounders                                                          | 12, 25-26 | The mean age of the patients (n=2043) was 76 years (as of Feb 2020) and 60.5% (1235/2043) were female. Two-thirds of the patients (63.5%, 1296/2043) had two or more chronic conditions. And also Table 1.                                                                                                  |
|                  |     | (b) Indicate number of participants with missing data for each variable of interest                                                                                                               |           | None                                                                                                                                                                                                                                                                                                        |
|                  |     | (c) <i>Cohort study</i> —Summarise follow-up time (eg, average and total amount)                                                                                                                  | 9-10      | Rostered patients with recent encounters identified and physicians were asked to complete                                                                                                                                                                                                                   |

|              |     |                                                                                                                                                                                                              |              |                                                                                                                                                                                                                                |
|--------------|-----|--------------------------------------------------------------------------------------------------------------------------------------------------------------------------------------------------------------|--------------|--------------------------------------------------------------------------------------------------------------------------------------------------------------------------------------------------------------------------------|
|              |     |                                                                                                                                                                                                              |              | frailty assessments (selecting a CFS score between 1-9) ...Frailty scored patients were linked to current disease coded data in the EMR and to neighbourhood level income and deprivation data.                                |
| Outcome data | 15* | <i>Cohort study</i> —Report numbers of outcome events or summary measures over time                                                                                                                          | 13-14; 25-26 | We studies associations between frailty level, and demographic characteristics, socioeconomic status and multimorbidity and chronic conditions patterns. Summarized in Table 1.                                                |
|              |     | <i>Case-control study</i> —Report numbers in each exposure category, or summary measures of exposure                                                                                                         |              |                                                                                                                                                                                                                                |
|              |     | <i>Cross-sectional study</i> —Report numbers of outcome events or summary measures                                                                                                                           |              |                                                                                                                                                                                                                                |
| Main results | 16  | (a) Give unadjusted estimates and, if applicable, confounder-adjusted estimates and their precision (eg, 95% confidence interval). Make clear which confounders were adjusted for and why they were included |              | Not applicable                                                                                                                                                                                                                 |
|              |     | (b) Report category boundaries when continuous variables were categorized                                                                                                                                    | 11, 25-26    | Age categories: 65-69, 70-74, 75-79, 80-84, 85-89, > 90 y<br>The number of chronic conditions (disorders and risk factors) were grouped as 0, 1, 2-4, 5+ and categorized having 1 or more conditions versus none. See Table 1. |
|              |     | (c) If relevant, consider translating estimates of relative risk into absolute risk for a meaningful time period                                                                                             |              | Not applicable                                                                                                                                                                                                                 |

Continued on next page



|    |                |    |                                                                                                |                                      |
|----|----------------|----|------------------------------------------------------------------------------------------------|--------------------------------------|
| 1  |                |    |                                                                                                |                                      |
| 2  | Other analyses | 17 | Report other analyses done—eg analyses of subgroups and interactions, and sensitivity analyses | 11-12                                |
| 3  |                |    |                                                                                                |                                      |
| 4  |                |    |                                                                                                |                                      |
| 5  |                |    |                                                                                                | We grouped the cohort by frailty     |
| 6  |                |    |                                                                                                | score as low (scored 1-3), medium    |
| 7  |                |    |                                                                                                | (scored 4-6), and high (scored 7-9). |
| 8  |                |    |                                                                                                | Male and female captured sex         |
| 9  |                |    |                                                                                                | groupings. Income quintiles          |
| 10 |                |    |                                                                                                | included scores of 1 (lowest         |
| 11 |                |    |                                                                                                | income) to 5 (highest income).       |
| 12 |                |    |                                                                                                | Material deprivation quintiles       |
| 13 |                |    |                                                                                                | included groupings of 1 (least       |
| 14 |                |    |                                                                                                | deprived) to 5 (most deprived). We   |
| 15 |                |    |                                                                                                | examined associations using Chi-     |
| 16 |                |    |                                                                                                | square, and ANOVA as appropriate.    |
| 17 |                |    |                                                                                                | Statistical significance was set at  |
| 18 |                |    |                                                                                                | alpha<0.05 (two-tailed). The data    |
| 19 |                |    |                                                                                                | were analyzed using IBM SPSS         |
| 20 |                |    |                                                                                                | Statistics (Version 28) predictive   |
| 21 |                |    |                                                                                                | analytics software.                  |
| 22 |                |    |                                                                                                |                                      |

## Discussion

|    |             |    |                                                          |                                                  |
|----|-------------|----|----------------------------------------------------------|--------------------------------------------------|
| 23 |             |    |                                                          |                                                  |
| 24 |             |    |                                                          |                                                  |
| 25 | Key results | 18 | Summarise key results with reference to study objectives | 12-14                                            |
| 26 |             |    |                                                          |                                                  |
| 27 |             |    |                                                          | Two-thirds of the patients (63.5%,               |
| 28 |             |    |                                                          | 1296/2043) had two or more                       |
| 29 |             |    |                                                          | chronic conditions. The distribution             |
| 30 |             |    |                                                          | of income quintiles was                          |
| 31 |             |    |                                                          | significantly different across the               |
| 32 |             |    |                                                          | frailty groups ( $\chi^2 = 61.42$ , $df=8$ , $p$ |
| 33 |             |    |                                                          | <0.001). The data show a trend of                |
| 34 |             |    |                                                          | more multimorbidity burden in the                |
| 35 |             |    |                                                          | high frail group (12%, 40%, 44%                  |
| 36 |             |    |                                                          | for 1, 2-3 and 5+ conditions),                   |
| 37 |             |    |                                                          | whereas the low frailty and medium               |
| 38 |             |    |                                                          | frailty groups showed higher                     |
| 39 |             |    |                                                          | proportions in the 2-4 conditions                |
| 40 |             |    |                                                          |                                                  |
| 41 |             |    |                                                          |                                                  |

|                  |    |                                                                                                                                                                            |    |                                                                                                                                                                                                                                                                                                                                                                                                                                                                                                                                                                               |
|------------------|----|----------------------------------------------------------------------------------------------------------------------------------------------------------------------------|----|-------------------------------------------------------------------------------------------------------------------------------------------------------------------------------------------------------------------------------------------------------------------------------------------------------------------------------------------------------------------------------------------------------------------------------------------------------------------------------------------------------------------------------------------------------------------------------|
|                  |    |                                                                                                                                                                            |    | category (43% and 49% for low frailty and medium frailty, respectively) ( $p < 0.001$ ).                                                                                                                                                                                                                                                                                                                                                                                                                                                                                      |
| Limitations      | 19 | Discuss limitations of the study, taking into account sources of potential bias or imprecision. Discuss both direction and magnitude of any potential bias                 | 16 | As a cross-sectional study, we cannot deduce the direction of causation of the associations between socio-economic status, multimorbidity and level of frailty. We have assumed neighbourhood level income and deprivation status provide reasonable accuracy with respect to the actual socioeconomic status of individual patients within our frailty cohort. We limited the cohort to patients for whom a single dissemination area (DA) code mapped to their postal code. This affects sample size but there is no reason to think it would affect the associations found |
| Interpretation   | 20 | Give a cautious overall interpretation of results considering objectives, limitations, multiplicity of analyses, results from similar studies, and other relevant evidence | 17 | Awareness of the triple disadvantage of disease burden, frailty, and socioeconomic disadvantage, as well as specific disease patterns can support a health equity approach to care for older adults within primary care.                                                                                                                                                                                                                                                                                                                                                      |
| Generalisability | 21 | Discuss the generalisability (external validity) of the study results                                                                                                      | 17 | This study highlights the need to anticipate and fund targeted health and social care approaches for achieving improved health equity                                                                                                                                                                                                                                                                                                                                                                                                                                         |

1  
2  
3  
4  
5  
6  
7  
8  
9  
10  
11  
12  
13  
14  
15  
16  
17  
18  
19  
20  
21  
22  
23  
24  
25  
26  
27  
28  
29  
30  
31  
32  
33  
34  
35  
36  
37  
38  
39  
40  
41  
42  
43  
44  
45  
46

---

and doing this through primary care.

---

**Other information**

---

|         |    |                                                                                                                                                               |   |                                                                                                                             |
|---------|----|---------------------------------------------------------------------------------------------------------------------------------------------------------------|---|-----------------------------------------------------------------------------------------------------------------------------|
| Funding | 22 | Give the source of funding and the role of the funders for the present study and, if applicable, for the original study on which the present article is based | 3 | Funding source: INSPIRE-PHC Program, Applied Health Research Question, Ontario Ministry of Health: Total Funding: \$31,680. |
|---------|----|---------------------------------------------------------------------------------------------------------------------------------------------------------------|---|-----------------------------------------------------------------------------------------------------------------------------|

---

\*Give information separately for cases and controls in case-control studies and, if applicable, for exposed and unexposed groups in cohort and cross-sectional studies.

**Note:** An Explanation and Elaboration article discusses each checklist item and gives methodological background and published examples of transparent reporting. The STROBE checklist is best used in conjunction with this article (freely available on the Web sites of PLoS Medicine at <http://www.plosmedicine.org/>, Annals of Internal Medicine at <http://www.annals.org/>, and Epidemiology at <http://www.epidem.com/>). Information on the STROBE Initiative is available at [www.strobe-statement.org](http://www.strobe-statement.org).

# BMJ Open

## Association between frailty, chronic conditions and socio-economic status in community-dwelling older adults attending primary care: A cross-sectional study using practice-based research network data

|                                 |                                                                                                                                                                                                                                                                                                                                                                                                                                                                                                                                                                                                                                                 |
|---------------------------------|-------------------------------------------------------------------------------------------------------------------------------------------------------------------------------------------------------------------------------------------------------------------------------------------------------------------------------------------------------------------------------------------------------------------------------------------------------------------------------------------------------------------------------------------------------------------------------------------------------------------------------------------------|
| Journal:                        | <i>BMJ Open</i>                                                                                                                                                                                                                                                                                                                                                                                                                                                                                                                                                                                                                                 |
| Manuscript ID                   | bmjopen-2022-066269.R1                                                                                                                                                                                                                                                                                                                                                                                                                                                                                                                                                                                                                          |
| Article Type:                   | Original research                                                                                                                                                                                                                                                                                                                                                                                                                                                                                                                                                                                                                               |
| Date Submitted by the Author:   | 06-Jan-2023                                                                                                                                                                                                                                                                                                                                                                                                                                                                                                                                                                                                                                     |
| Complete List of Authors:       | Mangin, Dee; McMaster University Faculty of Health Sciences, Department of Family Medicine<br>Lawson, Jennifer; McMaster University Faculty of Health Sciences, Department of Family Medicine<br>Risdon, Cathy; McMaster University Faculty of Health Sciences, Department of Family Medicine<br>Siu, Henry ; McMaster University Faculty of Health Sciences, Department of Family Medicine<br>Packer, Tamar; Hamilton Health Sciences and St. Joseph's Health Care<br>Wong, Sabrina T.; University of British Columbia, Centre for Health Services and Policy Research<br>Howard, Michelle; McMaster University, Department of Family Medicine |
| <b>Primary Subject Heading</b>: | General practice / Family practice                                                                                                                                                                                                                                                                                                                                                                                                                                                                                                                                                                                                              |
| Secondary Subject Heading:      | Health informatics, Epidemiology                                                                                                                                                                                                                                                                                                                                                                                                                                                                                                                                                                                                                |
| Keywords:                       | PRIMARY CARE, EPIDEMIOLOGY, Information management < BIOTECHNOLOGY & BIOINFORMATICS                                                                                                                                                                                                                                                                                                                                                                                                                                                                                                                                                             |
|                                 |                                                                                                                                                                                                                                                                                                                                                                                                                                                                                                                                                                                                                                                 |

SCHOLARONE™  
Manuscripts



I, the Submitting Author has the right to grant and does grant on behalf of all authors of the Work (as defined in the below author licence), an exclusive licence and/or a non-exclusive licence for contributions from authors who are: i) UK Crown employees; ii) where BMJ has agreed a CC-BY licence shall apply, and/or iii) in accordance with the terms applicable for US Federal Government officers or employees acting as part of their official duties; on a worldwide, perpetual, irrevocable, royalty-free basis to BMJ Publishing Group Ltd ("BMJ") its licensees and where the relevant Journal is co-owned by BMJ to the co-owners of the Journal, to publish the Work in this journal and any other BMJ products and to exploit all rights, as set out in our [licence](#).

The Submitting Author accepts and understands that any supply made under these terms is made by BMJ to the Submitting Author unless you are acting as an employee on behalf of your employer or a postgraduate student of an affiliated institution which is paying any applicable article publishing charge ("APC") for Open Access articles. Where the Submitting Author wishes to make the Work available on an Open Access basis (and intends to pay the relevant APC), the terms of reuse of such Open Access shall be governed by a Creative Commons licence – details of these licences and which [Creative Commons](#) licence will apply to this Work are set out in our licence referred to above.

Other than as permitted in any relevant BMJ Author's Self Archiving Policies, I confirm this Work has not been accepted for publication elsewhere, is not being considered for publication elsewhere and does not duplicate material already published. I confirm all authors consent to publication of this Work and authorise the granting of this licence.

1  
2  
3 **Association between frailty, chronic conditions and socio-economic status in**  
4  
5  
6 **community-dwelling older adults attending primary care: A cross-sectional**  
7  
8  
9 **study using practice-based research network data**  
10  
11  
12  
13

14 Mangin D (MBChB (Otago), DPH (Otago), FRNZCGP (NZ))<sup>1</sup>

15  
16 [mangind@mcmaster.ca](mailto:mangind@mcmaster.ca)  
17

18  
19 ORCID: 0000-0003-2149-9376  
20  
21  
22  
23

24 Lawson J (MLIS, MSc health candidate)<sup>1</sup>

25  
26 [hollj@mcmaster.ca](mailto:hollj@mcmaster.ca)  
27

28  
29 ORCID: 0000-0002-8122-9768  
30  
31  
32  
33

34 Risdon C (MD, Dman, CCFP, FCFP)<sup>1</sup>

35  
36 [risdonc@mcmaster.ca](mailto:risdonc@mcmaster.ca)  
37

38  
39 ORCID: 0000-0001-9024-1438  
40  
41  
42  
43

44 Siu H (MSc, MD, CCFP (COE), FCFP)<sup>1</sup>

45  
46 [siuh3@mcmaster.ca](mailto:siuh3@mcmaster.ca)  
47

48  
49 ORCID: 0000-0002-1593-6827  
50  
51  
52

53 Packer T (BSc, MD, FCFP)<sup>2</sup>

54  
55 [tpacker@stjosham.on.ca](mailto:tpacker@stjosham.on.ca)  
56  
57  
58  
59  
60

1  
2  
3 ORCID:0000-0003-4403-829X  
4  
5

6  
7  
8 Wong ST (RN, PhD)<sup>3</sup>  
9

10 [sabrina.wong@ubc.ca](mailto:sabrina.wong@ubc.ca)  
11

12 ORCID: 0000-0002-9619-9012  
13  
14

15  
16  
17  
18 Howard M (BA(Hons), MSc, PhD)<sup>1</sup>  
19

20 [mhoward@mcmaster.ca](mailto:mhoward@mcmaster.ca)  
21

22 ORCID: 0000-0001-8127-5492  
23  
24  
25  
26  
27  
28  
29

30 <sup>1</sup> Department of Family Medicine, McMaster University, Hamilton, Ontario, Canada  
31

32 <sup>2</sup> Chief, Departments of Family Medicine, Hamilton Health Sciences and St. Joseph's Healthcare,  
33

34 Primary Care Lead, Hamilton, Ontario, Canada  
35  
36

37 <sup>3</sup> Centre for Health Services and Policy Research, School of Nursing, University of British  
38

39 Columbia, Vancouver, British Columbia, Canada  
40  
41  
42  
43  
44

45 Corresponding Author:  
46

47 Dr. Dee Mangin  
48

49 David Braley Health Sciences Centre, McMaster University  
50

51 100 Main Street West, 5<sup>th</sup> floor  
52  
53

54 Hamilton, Ontario  
55  
56  
57  
58  
59  
60

1  
2  
3 L8P 1H6  
4

5  
6 Email: [mangind@mcmaster.ca](mailto:mangind@mcmaster.ca)  
7

8 Phone: 905-525-9140 ext. 21219  
9

10 Fax: 905-527-4440  
11  
12  
13  
14

15 Prior Presentation:  
16

17  
18 Lawson, J. Frailty Patterns in Community Dwelling Older Adults Attending Primary Care: A  
19  
20 Quantitative Analysis of Practice Based Research Network Data. Trillium PHC V Conference,  
21  
22 Ontario. October, 2020.  
23  
24  
25  
26  
27

28 Word count for the main text (excluding title page, abstract, competing interest, funding, data  
29  
30 sharing, ethics, references, tables, figures): 3519  
31

32 This manuscript contains:  
33

34  
35 2 Figures  
36

37 2 Tables  
38

39 1 Appendix  
40  
41  
42

43 **Abstract:**  
44  
45  
46  
47

48 **Objectives:** Frailty is a multidimensional syndrome of loss of reserves in energy, physical ability,  
49  
50 cognition, and general health. Primary care is key in preventing and managing frailty, mindful  
51  
52 of the social dimensions that contribute to its risk, prognosis, and the best fit of patient  
53  
54  
55  
56  
57  
58  
59  
60



1  
2  
3 supports. We studied associations between frailty levels and both chronic conditions and  
4  
5 socioeconomic status.  
6  
7

8  
9 **Design:** cross-sectional cohort study  
10

11  
12 **Setting:** A practice-based research network (PBRN) in Ontario, Canada, providing primary care  
13  
14 to 38,000 patients. The PBRN hosts a regularly updated, deidentified, longitudinal database  
15  
16 containing primary care practice data.  
17  
18

19  
20  
21  
22 **Participants:** Patients aged 65 years or older, with a recent encounter, rostered to family  
23  
24 physicians at the PBRN.  
25  
26

27  
28 **Intervention:** Physicians assigned a frailty score to patients using the nine-point Clinical Frailty  
29  
30 Scale (CFS). We linked frailty scores to chronic conditions and neighbourhood-level  
31  
32 socioeconomic status to examine associations between these three domains.  
33  
34

35  
36 **Results:** Among 2043 patients assessed, the prevalence of low (scoring 1-3), medium (scoring  
37  
38 4-6) and high frailty (scoring 7-9) was 55.9%, 40.3%, and 3.8% respectively. The prevalence of  
39  
40 five or more chronic diseases was 11% among low, 26% among medium and 44% among high  
41  
42 frailty groups ( $\chi^2 = 137.92$ , DoF 2,  $<0.001$ ). More disabling conditions appeared in the top 50%  
43  
44 of conditions in the highest frailty group compared to the low and medium groups. Increasing  
45  
46 frailty was significantly associated with lower neighbourhood income ( $\chi^2 = 61.42$ , DoF 8 p  
47  
48  $<0.001$ ) and higher neighbourhood material deprivation  $\chi^2 = 55.24$  Dof 8, p  $<0.001$ ).  
49  
50  
51  
52  
53  
54  
55  
56  
57  
58  
59  
60

1  
2  
3 **Conclusion:** This study demonstrates the triple disadvantage of frailty, disease burden, and  
4 socioeconomic disadvantage. Frailty care needs a health equity approach: We demonstrate the  
5 utility and feasibility of collecting patient-level data within primary care. Such data can relate  
6 social risk factors, frailty, and chronic disease toward flagging patients with the greatest need  
7 and creating targeted interventions.  
8  
9  
10  
11  
12  
13  
14  
15

## 16 Article Summary

### 17 Strengths and limitations of this study

#### 18 Strengths

- 19 • Data collection was facilitated with clinical championing contributing to a high Clinical  
20 Frailty Scale scoring completion rate (77% of among eligible patients), supporting  
21 internal and external validity
- 22 • A primary care practice-based research network was the source of both the prospective  
23 frailty assessment and retrospective clinical electronic medical record data  
24 demonstrating the research capacity of PBRN data
- 25 • Socioeconomic status was linked to patients through Canadian Census data

#### 26 Weaknesses

- 27 • This study is cross-sectional therefore we cannot deduce the direction of causation of  
28 the associations between socio-economic status, multimorbidity and level of frailty
- 29 • We used neighbourhood-level income and deprivation status in the absence of directly  
30 collected, patient-level socio-economic status which is not collected in the Primary Care  
31 EMR record

## Keywords:

Frailty

Multimorbidity

Chronic Disease

Socioeconomic Status

Social Deprivation

Health Equity

Primary Care

## Abbreviations:

MUSIC: McMaster University Sentinel and Information Collaboration

PBRN: Practice-based Research Network

CFS: Clinical Frailty Scale©

PCCF: Postal Code Conversion File<sup>OM</sup>

CHASS: Computing in the Humanities and Social Sciences

DA: Dissemination area

## Introduction:

Frailty is considered a multidimensional syndrome of loss of reserves in energy, physical ability, cognition, and general health. There are approximately 1.6 million people in Canada living with frailty.<sup>1</sup> Frail patients are complex and more susceptible to adverse health outcomes compared to non-frail people of the same chronological age.<sup>2</sup> Left unchecked, frail patients experience diminished quality of life, high risk for hospitalization and long-term care admission and increased mortality.<sup>3-5</sup>

Primary care, as the medical home for patients, plays a central role in chronic condition prevention and management, and care coordination<sup>6</sup>. Evidence clearly shows that stronger primary care is associated with better population outcomes, achieved through the key mechanisms of access (first contact), comprehensiveness, coordination and continuity (longitudinal care) and as such, has the potential to be the most equity enhancing aspect of clinical care.<sup>7</sup> On this premise, primary care plays a key role in preventing, identifying and managing frailty<sup>8</sup>, while taking into consideration the social dimensions that contribute to its associated risk, prognosis and facilitators or barriers to clinical intervention and supports.<sup>9</sup>

While frailty is not fully explained by the presence of specific health conditions, a large proportion of people experiencing frailty also have multiple chronic medical conditions (multimorbidity).<sup>10-12</sup> Multimorbidity negatively affects patient-important outcomes like disability, social participation, and self-rated physical and mental health and it contributes to care burden<sup>13,14</sup>, and the need for acute care services.<sup>12</sup> The combination of frailty and multimorbidity is likely to exacerbate their respective load of associative issues.

1  
2  
3 Low socioeconomic status is associated with multimorbidity, health risks, poorer prognoses,  
4 and challenges in accessing equitable care.<sup>15-18</sup> Lower socioeconomic status also reduces  
5 access to primary care<sup>16,19</sup>. The addition of a socioeconomic lens on the multimorbid and frail  
6 population can help focus effective interventions and distribute resources more effectively. In  
7 primary care, the longitudinal comprehensive primary care framework can be leveraged with  
8 clinicians identifying their frail patients, guiding them to appropriate goal-directed care, and  
9 helping them to proactively manage their complex health and social needs.  
10  
11  
12  
13  
14  
15  
16  
17  
18  
19  
20

21 Reliable screening tools for frailty are easy to use in primary care settings.<sup>20,21</sup> Identification of  
22 prefrail and frail patients in primary care creates the opportunity to develop targeted  
23 interventions that address quality of life, burden of unnecessary treatment, and assess  
24 barriers.<sup>2,3,22-24</sup> Such approaches are likely to improve the individual patient's health and  
25 experience of equitably delivered health care and ameliorate resource utilization. Planning and  
26 evaluating programs in primary care designed to meet the needs of all frail older adults would  
27 be better guided with an understanding of how chronic disease patterns and social factors  
28 (socioeconomic status) intersect and are patterned across prefrail and frail states.<sup>22</sup> We found  
29 little evidence that examined the intersection of frailty, multimorbidity and socioeconomic  
30 status, and with this study, we sought to explore their relationship.  
31  
32  
33  
34  
35  
36  
37  
38  
39  
40  
41  
42  
43  
44  
45

46 We hypothesized that patients with a greater number of chronic conditions, especially disabling  
47 conditions, and with lower socioeconomic status would be more likely to have a higher clinical  
48 frailty score. Our aim was to describe the distribution of frailty among older adult patients in  
49 primary care, and to describe the association between chronic conditions, socioeconomic status  
50  
51  
52  
53  
54  
55  
56  
57  
58  
59  
60

1  
2  
3 and frailty. This study adds a unique analysis of this association within a primary care  
4  
5 population with directly collected clinical frailty scores, not routinely applied in this population.  
6  
7

## 8 9 10 **Methods**

11  
12 We conducted a cross-sectional study of a cohort of older adults, created using electronic  
13  
14 medical records from a primary care practice-based research network (PBRN). Clinical frailty  
15  
16 assessments and neighbourhood-level income and deprivation data were linked to the patient's  
17  
18 clinical data available from their electronic medical records.  
19  
20

## 21 22 23 **Setting**

24  
25 The MUSIC Network is a PBRN in Hamilton, Ontario, Canada. Data holdings include a regularly  
26  
27 updated, deidentified, longitudinal database containing primary care practice data. There are  
28  
29 55 family physicians associated with the MUSIC Network. This study was based on a sub-set of  
30  
31 the 37 physicians in the MUSIC PBRN and their previously described 38,000 patients represent a  
32  
33 broad cross section of patients.<sup>25,26</sup>  
34  
35  
36  
37

## 38 39 40 **Participants**

41  
42 Patients aged 65 years or older, currently rostered (as of Jan2020) to family physicians of the  
43  
44 MUSIC network subgroup described above, were eligible to be included in the cohort.  
45  
46  
47

## 48 49 50 **Patient and Public Involvement**

51  
52 None  
53  
54  
55  
56  
57  
58  
59  
60

## Data Collection and Preparation

### Frailty Score Assignment

The Clinical Frailty Scale<sup>®</sup> (CFS) is a frailty screening tool that applies clinical judgement for scoring personal capacity, independence related to fitness and self-management of health. It can be reliably used to predict outcomes of mortality, comorbidity, functional decline, mobility, and cognitive decline. The CFS features a clinically validated 9-point scale ranging from 1 (very fit) to 9 (terminally ill) with scores of  $\geq 5$  indicating a frail state.<sup>20,27</sup> With low administration time (less than 1 minute per patient assessment) and low cost, the CFS has seen high utility across many clinical practice domains.<sup>20,28,29</sup> The CFS scoring instrument has been validated in a variety of healthcare settings including primary care and patients do not need to be seen in person for the physician to form an accurate score.<sup>21</sup> The CFS has good inter-rater agreement between physicians and multidisciplinary teams and correlates well with other frailty scoring instruments.<sup>28,29</sup>

Physicians were approached personally by the network leadership to discuss the rationale for the study and the utility of its results, to assess their support and perception of clinical relevance before formally engaging in the study. The participating physicians' EMR was used to identify rostered patients over the age of 65 and who had attended a clinical encounter within the last 6 months. Rostered patients are patients who are attached to a particular family physician who provides longitudinal primary care. The family physicians were provided with a list of eligible patients in their care, accompanied by the CFS scoring guide (Appendix A).

Physicians were asked to complete frailty assessments (selecting a CFS score between 1-9) for

1  
2  
3 patients for whom they were confident that they could assess, based on their overall  
4  
5 knowledge of the patient. This provided a reasonable, current assessment across the study  
6  
7 population. There were no other specific exclusion criteria.  
8  
9

10  
11 Scored lists were collected from each provider and securely entered within a research  
12  
13 database, replacing all patient identifiers with the MUSIC patient ID. Scores were completed for  
14  
15 77% of eligible patients.  
16  
17

### 18 19 20 Cohort Creation and Data Linkage

21  
22 The final cohort for this study included 2043 patients whose physician had assessed their frailty  
23  
24 level and who had: 1) a postal code in Hamilton that could accurately be linked to  
25  
26 neighbourhood-level information (described below) and 2) accessible disease diagnoses  
27  
28 through the MUSIC-PBRN database.  
29  
30

31  
32 To capture conditions, we used the ICD9 disease codes which are recorded by physicians, within  
33  
34 the disease registry module of the EMR. Coded conditions include disorders such as COPD and  
35  
36 heart failure as well as risk factors such as hypertension and dyslipidemia. Previous work that  
37  
38 improved the quantity and the consistency of chronic disease codes recorded within the MUSIC  
39  
40 PBRN EMR featured quick-pick lists of “preferred terms” for common and discrete primary care  
41  
42 conditions such as unipolar depression (311), and bipolar depression (296), both with distinct  
43  
44 codes.<sup>25</sup> For this study, certain conditions considered to be similar (i.e., variations of the same  
45  
46 base condition) were grouped, for example, Dementia (ICD9 290) and Alzheimers (ICD9 331.0),  
47  
48 in order to form meaningful groupings for frequency analysis.  
49  
50  
51  
52  
53  
54  
55  
56  
57  
58  
59  
60



1  
2  
3 We used the Postal Code<sup>OM</sup> Conversion File (PCCF), complementary to the 2016 Canadian  
4  
5 Census,<sup>30</sup> to translate patients' postal codes to the geographic census unit of dissemination  
6  
7 area. A dissemination area (DA) is a small geographic census area composed of one or more  
8  
9 neighbouring blocks, with a population of 400 to 700 persons.<sup>30</sup> In this, the cohort was limited  
10  
11 to only patients having a 1:1 mapping between their postal code and matching DA to facilitate a  
12  
13 simple and direct means of linking dissemination area to socioeconomic status data.  
14  
15  
16  
17

18  
19 The Canadian Socio-Economic Information Management System database was accessed via the  
20  
21 Computing in the Humanities and Social Sciences (CHASS) Canadian Census Analyser<sup>31</sup> to  
22  
23 retrieve economic family after-tax income decile group data<sup>32</sup>. Economic family after-tax  
24  
25 neighbourhood income decile groups can provide a rough ranking of an individual's relative  
26  
27 economic position. These income decile data were organized by dissemination area (DA)  
28  
29 geographical units. We calculated the median decile for each DA unit represented in our cohort  
30  
31 and linked this value to each patient via the postal code to DA map. We further collapsed the  
32  
33 decile groups into quintiles to achieve reasonable category sizes for statistical analysis.  
34  
35  
36  
37  
38  
39  
40

41 A second set of socioeconomic data from the Ontario Marginalization Index<sup>33</sup> was also linked to  
42  
43 the dataset using the same postal code to DA translation. The index provides a measure of  
44  
45 material deprivation, an estimate of the inability for individuals and communities to access and  
46  
47 attain basic material needs using indicators of income, quality of housing, educational  
48  
49 attainment, and family structure characteristics.  
50  
51  
52  
53  
54  
55  
56  
57  
58  
59  
60

## Data Analysis

We described the distribution of patient demographic characteristics, frailty, chronic conditions, and SES variables using simple descriptive analyses (means, median, frequencies and proportions, as appropriate). A review of the distribution of the CFS scores showed some score categories had very small numbers, therefore, for analysis purposes, we further grouped the cohort's frailty scores as low (scored 1-3), medium (scored 4-6), and high (scored 7-9).

We examined bivariate associations between frailty and other patient characteristics (demographics, multimorbidity and SES). Age was categorized as 65-69, 70-74, 75-79, 80-84, 85-89 and > 90 years. Male and female captured sex groupings. Income quintiles included scores of 1 (lowest income) to 5 (highest income). Material deprivation quintiles included groupings of 1 (least deprived) to 5 (most deprived). We examined chronic conditions (disorders and risk factors) in two ways: firstly, dichotomising as having 1 or more conditions versus none

We examined associations using Chi-square, and ANOVA as appropriate. Chi square test for association between frailty level grouping and other factors was used with all variables except age which was a continuous variable, where we used ANOVA.

Statistical significance was set at  $\alpha < 0.05$  (two-tailed). The data were analyzed using IBM SPSS Statistics (Version 28).

1  
2  
3 The study was approved by the Hamilton Integrated Research Ethics Board (HiREB No. 10683).  
4  
5

## 6 7 Results

### 8 9 Demographics

10  
11 The mean age of the patients (n= 2043) was 76 years (as of Feb 2020) and 60.5% (1235/2043)  
12  
13 were female. Two-thirds of the patients (63.5%, 1296/2043) had two or more chronic  
14  
15 conditions (Table 1).  
16  
17

### 18 19 Frailty Distribution

20  
21 Figure 1 shows the frailty distribution over all 9 CFS categories with a slightly skewed  
22  
23 distribution with fewer patients in the frailest categories and the highest proportion of patients  
24  
25 scored as 3.  
26  
27

### 28 29 Median Income Distribution

30  
31 Figure 2 shows the full distribution of median economic family after-tax income deciles (1 as  
32  
33 lowest income decile, 10 as highest income decile). There was a near-normal distribution with  
34  
35 the highest proportion of patients in decile 6. Grouping deciles into quintiles with 1 designated  
36  
37 as lower income and 5 as higher income, most patients were in the middle quintile (3) (38.3%)  
38  
39 with the smallest proportions in the lowest (5.1%) and highest income (4.5%) quintiles (Table  
40  
41  
42  
43  
44  
45 1).  
46  
47  
48  
49  
50  
51  
52  
53  
54  
55  
56  
57  
58  
59  
60

**Table 1: Associations between frailty score and demographic characteristics, deprivation indicators and multimorbidity (N=2,043).**

| Characteristic                             | Overall     | Low Frailty,<br>n (%) | Medium Frailty,<br>n (%) | High Frailty,<br>n (%) | P-value             |
|--------------------------------------------|-------------|-----------------------|--------------------------|------------------------|---------------------|
| Frailty group                              | 2,043       | 1,141 (55.9)          | 824 (40.3)               | 78 (3.8)               |                     |
| <b>Demographics</b>                        |             |                       |                          |                        |                     |
| Mean Age (SD)                              | 76 (7.8)    | 73.3 (5.9)            | 79.1 (8.2)               | 85.2 (9.0)             | <0.001 <sup>a</sup> |
| Median Age (Range)                         | 74 (65-103) | 72 (65-99)            | 78 (65-103)              | 86 (66-102)            | <0.001 <sup>b</sup> |
| Age grouping                               |             |                       |                          |                        |                     |
| 65-69                                      | 589 (29)    | 440 (39)              | 143 (17)                 | 6 (8)                  | <0.001 <sup>c</sup> |
| 70-74                                      | 540 (26)    | 355 (31)              | 176 (21)                 | 9 (12)                 |                     |
| 75-79                                      | 374 (18)    | 210 (18)              | 156 (19)                 | 8 (10)                 |                     |
| 80-84                                      | 247 (12)    | 84 (7)                | 148 (18)                 | 15 (19)                |                     |
| 85-89                                      | 173 (9)     | 40 (4)                | 120 (15)                 | 13 (17)                |                     |
| > 90 y                                     | 120 (6)     | 12 (1)                | 81 (10)                  | 27 (35)                |                     |
| Female, n (%)                              | 1236 (61)   | 647 (57)              | 535 (65)                 | 54 (69)                | <0.001 <sup>c</sup> |
| Male, n (%)                                | 807 (40)    | 494 (43)              | 289 (35)                 | 24 (31)                |                     |
| <b>Median income quintile <sup>d</sup></b> |             |                       |                          |                        |                     |
| 1 (low)                                    | 104 (5)     | 35 (3)                | 65 (8)                   | 4 (5)                  | <0.001 <sup>c</sup> |
| 2                                          | 545 (27)    | 269 (24)              | 250 (30)                 | 26 (33)                |                     |
| 3                                          | 783 (38)    | 429 (38)              | 324 (39)                 | 30 (39)                |                     |
| 4                                          | 520 (26)    | 348 (31)              | 157 (19)                 | 15 (19)                |                     |
| 5 (high)                                   | 91 (5)      | 60 (5)                | 28 (3)                   | 3 (4)                  |                     |
| <b>Deprivation quintile <sup>e</sup></b>   |             |                       |                          |                        |                     |
| 1 (least deprived)                         | 411 (20)    | 286 (25)              | 113 (14)                 | 12 (15)                | <0.001 <sup>c</sup> |
| 2                                          | 302 (15)    | 182 (16)              | 106 (13)                 | 14 (18)                |                     |
| 3                                          | 348 (17)    | 179 (16)              | 156 (19)                 | 13 (17)                |                     |
| 4                                          | 530 (26)    | 277 (24)              | 228 (28)                 | 25 (32)                |                     |
| 5 (most deprived)                          | 452 (22)    | 217 (19)              | 221 (27)                 | 14 (18)                |                     |
| <b>Multimorbidity <sup>f</sup></b>         |             |                       |                          |                        |                     |
| No. chronic conditions <sup>f</sup>        |             |                       |                          |                        |                     |
| 0                                          | 338 (17)    | 261 (23)              | 73 (9)                   | 4 (5)                  |                     |
| 1+                                         | 1,705 (84)  | 880 (77)              | 751 (91)                 | 74 (95)                | <0.001 <sup>c</sup> |
| 1                                          | 409 (20)    | 267 (23)              | 133 (16)                 | 9 (12)                 | <0.001 <sup>c</sup> |
| 2-4                                        | 923 (45)    | 487 (43)              | 405 (49)                 | 31 (40)                |                     |
| 5+                                         | 373 (18)    | 126 (11)              | 213 (26)                 | 34 (44)                |                     |

<sup>a</sup> *P* value from ANOVA test

<sup>b</sup> *P* value from Kruskal-Wallis test

<sup>c</sup> *P* value from  $\chi^2$  test for categorical data

<sup>d</sup> Mean value of Economic family after-tax income decile group data at dissemination area level, based on Statistics Canada 2016 Census data.

<sup>e</sup> Deprivation score categories from the Ontario Marginalization Index at dissemination area level

<sup>f</sup> Chronic disorders and risk factor conditions coded by physicians with ICD9

## Associations between Frailty Level, and Demographic Characteristics Socioeconomic Status and Multimorbidity

Mean age ascended across frailty groups at 73 years in the low frailty group, 78 years in the medium frailty group and 85 years in the high frailty group (ANOVA,  $F = 231.62$ , DoF 2,  $p < 0.0001$ ) (Table 1). The proportion of patients who were female increased across low, medium and high frailty groups (57%, 65%, 69% respectively) ( $\chi^2 = 16.12$ ,  $df = 3$ ,  $p < 0.001$ ).

The distribution of income quintiles was significantly different across the frailty groups ( $\chi^2 = 61.42$ ,  $df = 8$ ,  $p < 0.001$ ). There is some trend of moderate and higher frailty patients associated with lower income quintiles compared to patients with low frailty. (Table 1).

There were significant differences in proportions of patients in different frailty groups across the material deprivation quintile groupings ( $\chi^2 = 55.243$ ,  $df = 8$ ,  $p < 0.001$ ). Table 1 also shows certain trending of the higher frailty group associated with greater deprivation, compared to the moderate and low frailty groups that show less deprivation.

1  
2  
3 Patients with higher frailty were more likely to have at least one coded condition (95%, 91%  
4 and 77% in the high, medium and low frailty groupings, respectively ( $\chi^2 = 75.7254$ , DoF 2,  $p$   
5  $<0.0001$ ). Furthermore, the accumulation of chronic disease (1, 2-4 or 5+ conditions) differed  
6 across frailty groups ( $\chi^2 = 169.6$  Dof 6,  $p <0.001$ ). The data show a trend of more multimorbidity  
7 burden in the high frail group (12%, 40%, 44% for 1, 2-4 and 5+ conditions), whereas the low  
8 frailty and medium frailty groups showed higher proportions in the 2-4 conditions category  
9 (43% and 49% for low frailty and medium frailty, respectively) ( $p <0.001$ ).

### 21 Chronic Conditions Patterns

22  
23  
24 Table 2 shows the most frequent chronic conditions and risk factors (e.g., hypertension and  
25 hyperlipidemia) in each frailty grouping. A core set of high frequency conditions composed at  
26 least 50% of all conditions in all three frailty groups but more conditions were included in the  
27 top 50% as frailty increased. In the low frailty group, 5 conditions composing the risk factors  
28 hypertension and hyperlipidemia and the disorders diabetes, osteoarthritis/joint pain, and  
29 depression - unipolar) comprised 52% of their conditions. These 5 conditions persisted in the  
30 medium frailty group with the addition of 2 more conditions (back, neck pain and sciatica and  
31 cardiac dysrhythmia) composing 51% of conditions. In the high-scored frailty group, 9  
32 conditions comprised 52% of the conditions, with dementia/Alzheimers, congestive heart  
33 failure and acute and chronic coronary artery disease (CAD) appearing uniquely and displacing  
34 back, neck pain and sciatica. Among other burdensome disease, chronic obstructive pulmonary  
35 disease was a relatively common condition in the high and medium frailty groups (falling within  
36  
37  
38  
39  
40  
41  
42  
43  
44  
45  
46  
47  
48  
49  
50  
51  
52  
53  
54  
55  
56  
57  
58  
59  
60

54% of all conditions for both) and but less so in the low frailty group (falling within the top 70% of all conditions).

**Table 2: Array and Proportion of Conditions (Disorders and Risk Factors<sup>c</sup>) in each Frailty Grouping among the 2043 primary care patients**

| Frailty Score 1-3                            | Proportion of Grouping Diagnoses | Frailty Score 4-6                            | Proportion of Grouping Diagnoses | Frailty Score 7-9                            | Proportion of Grouping Diagnoses |
|----------------------------------------------|----------------------------------|----------------------------------------------|----------------------------------|----------------------------------------------|----------------------------------|
| Hypertension <sup>c</sup>                    | 19%                              | Hypertension <sup>c</sup>                    | 14.9%                            | Hypertension <sup>c</sup>                    | 11.8%                            |
| Diabetes                                     | 12%                              | Diabetes                                     | 9.7%                             | Osteoarthritis and Joint Pain                | 7.3%                             |
| Hyperlipidemia/<br>Dyslipidemia <sup>c</sup> | 8.3%                             | Osteoarthritis and Joint Pain                | 7.7%                             | Diabetes                                     | 6.4%                             |
| Osteoarthritis and Joint Pain                | 7.2%                             | Hyperlipidemia/<br>Dyslipidemia <sup>c</sup> | 5.8%                             | Dementia/<br>Alzheimers <sup>b</sup>         | 5.6%                             |
| Depression (unipolar)                        | 5.9%                             | Depression (unipolar)                        | 5.5%                             | Cardiac Dysrhythmia                          | 5.6%                             |
|                                              |                                  | Back, Neck Pain and Sciatica <sup>a</sup>    | 4%                               | Depression                                   | 4.5%                             |
|                                              |                                  | Cardiac Dysrhythmia <sup>a</sup>             | 3.3%                             | Congestive Heart Failure <sup>b</sup>        | 3.6%                             |
|                                              |                                  |                                              |                                  | Hyperlipidemia/<br>Dyslipidemia <sup>c</sup> | 3.4%                             |
|                                              |                                  |                                              |                                  | Acute and Chronic CAD <sup>b</sup>           | 3.40%                            |
| <b>Total proportion</b>                      | <b>52.3%</b>                     |                                              | <b>50.7%</b>                     |                                              | <b>51.5%</b>                     |

<sup>a</sup> first appears in medium frailty group

<sup>b</sup> first appears in high frailty group

<sup>c</sup> Risk Factors type among conditions

## Discussion

In this study of older adult patients in primary care, almost half of the patients evaluated by their family physician had a moderate or high level of frailty. Higher frailty level was associated with older age, being female and having more chronic conditions, especially life-limiting or

1  
2  
3 disabling conditions such as cardiovascular diseases and dementia. Higher frailty level was also  
4  
5 associated with indicators of lower socio-economic status.  
6  
7

8  
9 The usability of the CFS in primary care was evidenced in our study with frailty scores  
10  
11 completed for 77% of eligible patients. This directly collected data was a strength of the study,  
12  
13 as was the study setting within a practice-based research network where disease coding in the  
14  
15 EMR has been strengthened through previous initiatives.<sup>25</sup> We attribute the high scoring  
16  
17 completion rate on a combination of factors: clinicians were engaged prior to deciding to go  
18  
19 forward with the study, the study aligned with physicians' interests in supporting frail patients  
20  
21 as well as effective leadership and clinical championing of this study and its data collection  
22  
23 requirements.  
24  
25  
26  
27

28  
29 The cohort showed a near normal distribution across high, medium, and low frailty groups, with  
30  
31 the most common scores lying in the middle quintile. As expected in a community dwelling  
32  
33 cohort, there were fewer older adults in the most-frail group as these patients are more likely  
34  
35 to need long-term care accommodation supports.<sup>4</sup>  
36  
37  
38

39  
40 We have identified shifts in the patterns of the most common conditions that affect the older  
41  
42 adult primary care population across categories of increasing frailty. Furthermore, in those  
43  
44 experiencing high frailty conditions, substantial and life-limiting morbidity appear more  
45  
46 commonly, and so does their burdensome management requirements, greater risk for  
47  
48 hospitalization, and lowered quality of life.<sup>12-14,34</sup>  
49  
50  
51  
52  
53  
54  
55  
56  
57  
58  
59



1  
2  
3 We found that living in neighbourhoods of lower income and higher social material deprivation  
4 was more common among patients with moderate and high frailty. These differences have  
5 important implications at population level and may reflect large numbers of patients at risk for  
6 negative health outcomes. Socio-economic disadvantages may be compounded by costs  
7 associated with living with frailty (e.g., need for mobility aids) in addition to the costs of  
8 managing the individual health conditions.<sup>5,12</sup>  
9  
10  
11  
12  
13  
14  
15  
16  
17

18  
19 A health equity approach involves specific targeting of programs or resources to those most  
20 disadvantaged. The associations among frailty, chronic disease, and socioeconomic status,  
21 shown in this study, can support a health equity approach in planning health care for older  
22 adults within primary care. Ideally, the availability of all three data pieces would enable focused  
23 targeting of programs or resources to older adults who are most disadvantaged in primary care,  
24 but the unique disease patterns we identified in higher frailty groups also provides a marker of  
25 likely triple disadvantage.  
26  
27  
28  
29  
30  
31  
32  
33  
34  
35  
36  
37

38 We have also shown the utility and feasibility of collecting frailty data in a PBRN. The MUSIC  
39 Network immediately used these data in a targeted approach to COVID-19 remote care  
40 monitoring during Ontario's first and most serious wave of the pandemic. As it was not  
41 practically possible to contact all older adults, the MUSIC clinical teams used prepared digital  
42 files that sorted older adults by frailty score, with chronic conditions information. This enabled  
43 the Family Health Teams to take an equity focused approach, prioritizing contact with a  
44 subgroup of older adult patients who were scored higher for frailty to provide COVID education  
45 and to ensure food and medication security.  
46  
47  
48  
49  
50  
51  
52  
53  
54  
55  
56  
57  
58  
59  
60

1  
2  
3  
4 The high uptake of CFS coding shows that frailty measures could become routine data points  
5  
6 that are scored regularly and recorded within the EMR. Future work should also be directed at  
7  
8 systematically and standardly collecting and integrating, as a first step, neighbourhood level SES  
9  
10 data available from census data, and then ideally moving to patient level SES data within the  
11  
12 primary care EMR. SES, frailty, and chronic disease markers could be automatically combined  
13  
14 within the EMR to identify patients at risk of a poor prognosis. Patient level EMR flags or  
15  
16 practice level dashboard could alert providers or quality specialists, respectively, to the need for  
17  
18 interventions for addressing social and clinical risk factors for these patients, and to allow  
19  
20 program development within clinics of larger groupings to direct resources to those with  
21  
22 greatest need.  
23  
24  
25  
26  
27  
28  
29  
30  
31

## 32 Limitations

33  
34  
35 The study design is cross-sectional therefore we cannot deduce the direction of causation of  
36  
37 the associations between socio-economic status, multimorbidity and level of frailty.  
38  
39  
40  
41

42 Information on individual socio-economic status is not routinely collected in primary care. We  
43  
44 have assumed neighbourhood-level income and deprivation status provide reasonable accuracy  
45  
46 with respect to the actual socioeconomic status of individual patients within our frailty cohort.  
47  
48 Neighbourhood-level information on indicators such as income may not reflect actual wealth  
49  
50 among older adults who are more likely to have left the workforce due to retirement.  
51  
52  
53  
54  
55  
56  
57  
58  
59  
60

1  
2  
3 We limited the cohort to patients for whom a single dissemination area (DA) code mapped to  
4 their postal code. This affects sample size but there is no reason to think it would affect the  
5  
6 associations found. Similarly, the limitation of the cohort to those with a recent encounter for  
7  
8 whom the clinician had enough knowledge to complete a CFS should not affect the associations  
9  
10  
11  
12  
13 seen.

## 14 15 16 17 18 19 Conclusions

20  
21  
22  
23 Awareness of the triple disadvantage of frailty, disease burden, and socioeconomic  
24  
25 disadvantage, as well as specific disease patterns can support a health equity approach to care  
26  
27  
28 for older adults within primary care.

29  
30  
31 The confluence of health and social disadvantage and increasing frailty highlights the need for  
32  
33 targeted health and social care approaches for achieving improved health equity. Our findings  
34  
35 also underscore the need to anticipate required healthcare services and to use finite resources  
36  
37 most effectively. Grounding this approach in primary care with the appropriate data supports,  
38  
39 is highly appropriate as evidence shows primary care is a strong mechanism for reducing health  
40  
41  
42  
43  
44  
45  
46  
47  
48  
49  
50  
51  
52  
53  
54  
55  
56  
57  
58  
59  
60  
inequity, fostering access to comprehensive longitudinal care as well as targeted clinical and  
program innovations that are effective in reducing modifiable health inequity.<sup>7</sup>

## Figure Legend/Caption

Figure 1 Caption: Frailty Score<sup>a</sup> Distribution among the 2043 primary care patients

1  
2  
3 Figure 1 Legend: <sup>a</sup>Frailty scored on a 9-point scale ranging from 1 (very fit) to 9 (terminally ill)  
4 with scores of  $\geq 5$  indicating a frail state.<sup>20,27</sup>  
5  
6  
7  
8  
9

10 Figure 2 Caption: Median Family After-Tax Neighbourhood Income Decile<sup>a</sup> Distribution among  
11 the 2043 Patients  
12  
13  
14

15 Figure 2 Legend: <sup>a</sup>Median economic family after-tax income decile (1 as lowest income decile,  
16 10 as highest income decile).  
17  
18  
19  
20

## 21 Contributorship Statement

22  
23 Substantial contributions to the conception or design of the work: DM, JL, MH. Acquisition of  
24 data: DM, JL. Analysis or interpretation of data for the work: DM, JL, MH. Drafting the work or  
25 revising it critically for important intellectual content: DM, JL, CR, HS, TP, SW, MH. Final  
26 approval of the version to be published: DM, JL, CR, HS, TP, SW, MH. Agreement to be  
27 accountable for all aspects of the work in ensuring that questions related to the accuracy or  
28 integrity of any part of the work are appropriately investigated and resolved: DM, JL, CR, HS, TP,  
29 SW, MH. DM is the guarantor.  
30  
31  
32  
33  
34  
35  
36  
37  
38  
39  
40

## 41 Acknowledgements

42  
43 The authors would like to thank the primary care clinicians and patients of the MUSIC PBRN  
44 who contribute their data to the MUSIC Network through which the study data were generated  
45 for this project. We also acknowledge Krzysztof Adamczyk, the information technology lead for  
46 the MUSIC network and Vivek Jadon from McMaster Libraries for guidance to Statistics Canada  
47 data and Jennifer Salerno for statistical support. We thank Kathy De Caire, Kati Ivanyi, Doug  
48  
49  
50  
51  
52  
53  
54  
55  
56  
57  
58  
59  
60

1  
2  
3 Oliver, and Jill Berridge for their executive support in the implementation of this project. We  
4  
5 acknowledge the support of the McMaster University Department of Family Medicine for this  
6  
7 PBRN. We recognize the work of the Canadian Primary Care Sentinel Surveillance Network  
8  
9 partnering with the Canadian Frailty Network in the original implementation of the CFS across  
10  
11 many of its networks.  
12  
13  
14  
15  
16  
17

## 18 Competing Interest

19  
20 All authors have completed the ICMJE uniform disclosure form at  
21  
22 <http://www.icmje.org/disclosure-of-interest/> and declare: no support from any organisation for  
23  
24 the submitted work; no financial relationships with any organisations that might have an  
25  
26 interest in the submitted work in the previous three years; no other relationships or activities  
27  
28 that could appear to have influenced the submitted work.  
29  
30  
31  
32  
33  
34

## 35 Funding

36  
37 This work was supported by the INSPIRE-PHC Program, Applied Health Research Question,  
38  
39 Ontario Ministry of Health, grant number 6023175, Total Funding: \$31,680.  
40  
41  
42  
43

## 44 Data Sharing Statement

45  
46 The dataset is available by contact with the corresponding author Dr. Dee Mangin

47  
48 [mangind@mcmaster.ca](mailto:mangind@mcmaster.ca).

## 49 Ethics

The study was approved by the Hamilton Integrated Research Ethics Board (HiREB No. 10683).

Patient consent was waived as this study applied deidentified retrospective data.

## References

1. Frailty matters. Canadian Frailty Network. <https://www.cfn-nce.ca/frailty-matters/>. Accessed January 13, 2022.
2. Lacas A, Rockwood K. Frailty in primary care: a review of its conceptualization and implications for practice. *BMC medicine*. 2012;10:4.
3. Crocker TF, Brown L, Clegg A, et al. Quality of life is substantially worse for community-dwelling older people living with frailty: systematic review and meta-analysis. *Qual Life Res*. 2019;28(8):2041-2056.
4. Kojima G. Frailty as a predictor of nursing home placement among community-dwelling older adults: A systematic review and meta-analysis. *J Geriatr Phys Ther*. 2018;41(1):42-48.
5. Kojima G. Increased healthcare costs associated with frailty among community-dwelling older people: A systematic review and meta-analysis. *Arch Gerontol Geriatr*. 2019;84:103898.
6. Bodenheimer T, Pham HH. Primary care: current problems and proposed solutions. *Health Aff (Millwood)*. 2010;29(5):799-805.
7. Starfield B, Gervas J, Mangin D. Clinical care and health disparities. *Annu Rev Public Health*. 2012;33:89-106.

- 1  
2  
3 8. Serra-Prat M, Sist X, Domenich R, et al. Effectiveness of an intervention to prevent frailty in  
4 pre-frail community-dwelling older people consulting in primary care: a randomised  
5 controlled trial. *Age and ageing*. 2017;46(3):401-407.  
6  
7
- 8  
9  
10 9. Andrew MK, Dupuis-Blanchard S, Maxwell C, et al. Social and societal implications of frailty,  
11 including impact on Canadian healthcare systems. *J Frailty Aging*. 2018;7(4):217-223.  
12  
13
- 14 10. Yarnall AJ, Sayer AA, Clegg A, Rockwood K, Parker S, Hindle JV. New horizons in  
15 multimorbidity in older adults. *Age and ageing*. 2017;46(6):882-888.  
16  
17
- 18 11. Vetrano DL, Palmer K, Marengoni A, et al. Frailty and multimorbidity: a systematic review  
19 and meta-analysis. *J Gerontol A Biol Sci Med Sci*. 2019;74(5):659-666.  
20  
21
- 22 12. Wolff JL, Starfield B, Anderson G. Prevalence, expenditures, and complications of multiple  
23 chronic conditions in the elderly. *Arch Intern Med*. 2002;162(20):2269-2276.  
24  
25
- 26 13. Griffith LE, Gilsing A, Mangin D, et al. Multimorbidity frameworks impact prevalence and  
27 relationships with patient-important outcomes. *J Am Geriatr Soc*. 2019;67(8):1632-1640.  
28  
29
- 30 14. Fortin M, Dubois MF, Hudon C, Soubhi H, Almirall J. Multimorbidity and quality of life: a  
31 closer look. *Health Qual Life Outcomes*. 2007;5:52.  
32  
33
- 34 15. Mercer SW, Watt GC. The inverse care law: clinical primary care encounters in deprived and  
35 affluent areas of Scotland. *Ann Fam Med*. 2007;5(6):503-510.  
36  
37
- 38 16. Mercer SW, Zhou Y, Humphris GM, et al. Multimorbidity and Socioeconomic Deprivation in  
39 Primary Care Consultations. *Ann Fam Med*. 2018;16(2):127-131.  
40  
41
- 42 17. Dahrouge S, Hogg W, Muggah E, Schrecker T. Equity of primary care service delivery for low  
43 income "sicker" adults across 10 OECD countries. *Int J Equity Health*. 2018;17(1):182.  
44  
45  
46  
47  
48  
49  
50  
51  
52  
53  
54  
55  
56  
57  
58  
59  
60

- 1  
2  
3 18. Salisbury C, Johnson L, Purdy S, Valderas JM, Montgomery AA. Epidemiology and impact of  
4  
5  
6  
7  
8  
9  
10  
11  
12  
13  
14  
15  
16  
17  
18  
19  
20  
21  
22  
23  
24  
25  
26  
27  
28  
29  
30  
31  
32  
33  
34  
35  
36  
37  
38  
39  
40  
41  
42  
43  
44  
45  
46  
47  
48  
49  
50  
51  
52  
53  
54  
55  
56  
57  
58  
59  
60  
2011;61(582):e12-21.
19. O'Brien R, Wyke S, Guthrie B, Watt G, Mercer S. An 'endless struggle': a qualitative study of  
general practitioners' and practice nurses' experiences of managing multimorbidity in socio-  
economically deprived areas of Scotland. *Chronic Illn.* 2011;7(1):45-59.
20. Rockwood K, Song X, MacKnight C, et al. A global clinical measure of fitness and frailty in  
elderly people. *CMAJ.* 2005;173(5):489-495.
21. Thandi M, Wong ST, Aponte-Hao S, et al. Strategies for working across Canadian practice-  
based research and learning networks (PBRLNs) in primary care: focus on frailty. *BMC Fam  
Pract.* 2021;22(1):220.
22. Lee L, Heckman G, Molnar FJ. Frailty: Identifying elderly patients at high risk of poor  
outcomes. *Can Fam Physician.* 2015;61(3):227-231.
23. Theou O, Park GH, Garm A, Song X, Clarke B, Rockwood K. Reversing frailty levels in primary  
care using the CARES model. *Can Geriatr J.* 2017;20(3):105-111.
24. Lawson B, Sampalli T, Warner G, et al. Improving Care for the frail in Nova Scotia: an  
implementation evaluation of a frailty portal in primary care practice. *Int J Health Policy  
Manag.* 2019;8(2):112-123.
25. Mangin D, Lawson J, Adamczyk K, Guenter D. Embedding "smart" disease coding within  
routine electronic medical record workflow: prospective single-arm trial. *JMIR Med Inform.*  
2020;8(7):e 16764.



- 1  
2  
3 26. Mangin D, Lawson J, Cuppage J, et al. Legacy drug-prescribing patterns in primary care. *Ann*  
4  
5 *Fam Med*. 2018;16(6):515-520.  
6  
7  
8 27. Rockwood K, Theou O. Using the clinical frailty scale in allocating scarce health care  
9  
10 resources. *Can Geriatr J*. 2020;23(3):210-215.  
11  
12  
13 28. Church S, Rogers E, Rockwood K, Theou O. A scoping review of the clinical frailty scale. *BMC*  
14  
15 *Geriatr*. 2020;20(1):393.  
16  
17  
18 29. Oviedo-Briones M, Laso AR, Carnicero JA, et al. A comparison of frailty assessment  
19  
20 instruments in different clinical and social care settings: the frailtools project. *J Am Med Dir*  
21  
22 *Assoc*. 2021;22(3):607 e607-607 e612.  
23  
24  
25 30. Statistics Canada. Postal Code<sup>OM</sup> Conversion File (PCCF), Reference Guide.  
26  
27 <https://www150.statcan.gc.ca/n1/pub/92-154-g/92-154-g2017001-eng.htm>. Accessed:  
28  
29 March 10, 2020.  
30  
31  
32 31. University of Toronto. CHASS Canadian Census Analyser.  
33  
34 <http://dc1.chass.utoronto.ca/census/index.html>. Accessed: March 12, 2020.  
35  
36  
37 32. Statistics Canada. Dictionary, Census of Population, 2016 - Economic family after-tax income  
38  
39 decile group. [https://www12.statcan.gc.ca/census-recensement/2016/ref/dict/pop166-](https://www12.statcan.gc.ca/census-recensement/2016/ref/dict/pop166-eng.cfm)  
40  
41 [eng.cfm](https://www12.statcan.gc.ca/census-recensement/2016/ref/dict/pop166-eng.cfm). Accessed September 13, 2020.  
42  
43  
44 33. Matheson FI, van Ingen T. 2016 Ontario marginalization index. Toronto, ON: St. Michael's  
45  
46 Hospital; 2018. Joint publication with Public Health Ontario. Megari K. Quality of life in  
47  
48 chronic disease patients. *Health Psychol Res*. 2013;1(3):e27.  
49  
50  
51 34. Megari K. Quality of Life in Chronic Disease Patients. *Health Psychol Res*. 2013;1(3):e27.  
52  
53  
54  
55  
56  
57  
58  
59  
60

1  
2  
3  
4  
5  
6  
7  
8  
9  
10  
11  
12  
13  
14  
15  
16  
17  
18  
19  
20  
21  
22  
23  
24  
25  
26  
27  
28  
29  
30  
31  
32  
33  
34  
35  
36  
37  
38  
39  
40  
41  
42  
43  
44  
45  
46  
47  
48  
49  
50  
51  
52  
53  
54  
55  
56  
57  
58  
59  
60

For peer review only

Figure 1: Frailty Score<sup>a</sup> Distribution among the 2043 primary care patients

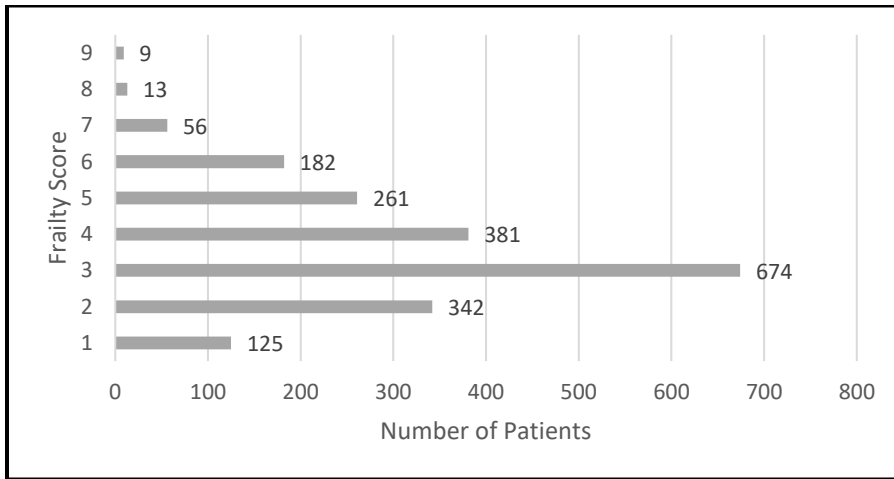

<sup>a</sup> Frailty scored on a 9-point scale ranging from 1 (very fit) to 9 (terminally ill) with scores of  $\geq 5$  indicating a frail state.<sup>20,27</sup>

peer review only

Figure 2: Median Family After-Tax Neighbourhood Income Decile<sup>a</sup> Distribution among the 2043

Patients

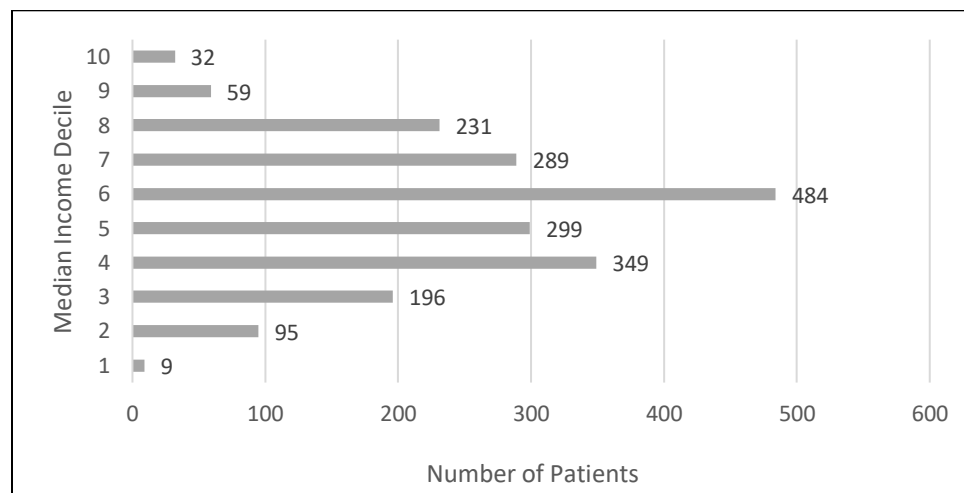

<sup>a</sup> Median economic family after-tax income decile (1 as lowest income decile, 10 as highest income decile).

## Appendix A: The Clinical Frailty Scale©

**Clinical Frailty Scale\***

|                                                                                                                                                                                                                                                                                                                                                                                                                                                                                                                                                                                                                                                                                                                                                                                                                                                                                                                                                                                                                                                                                                                                                                                                                                                                                                                                                                                                                                                                                                                                                                                                                                                                                                                                                                                                                                                       |                                                                                                                                                                                                                                                                                                                                                                                                                                                                                                                                                                                                                                                                                                                                                                                                                            |
|-------------------------------------------------------------------------------------------------------------------------------------------------------------------------------------------------------------------------------------------------------------------------------------------------------------------------------------------------------------------------------------------------------------------------------------------------------------------------------------------------------------------------------------------------------------------------------------------------------------------------------------------------------------------------------------------------------------------------------------------------------------------------------------------------------------------------------------------------------------------------------------------------------------------------------------------------------------------------------------------------------------------------------------------------------------------------------------------------------------------------------------------------------------------------------------------------------------------------------------------------------------------------------------------------------------------------------------------------------------------------------------------------------------------------------------------------------------------------------------------------------------------------------------------------------------------------------------------------------------------------------------------------------------------------------------------------------------------------------------------------------------------------------------------------------------------------------------------------------|----------------------------------------------------------------------------------------------------------------------------------------------------------------------------------------------------------------------------------------------------------------------------------------------------------------------------------------------------------------------------------------------------------------------------------------------------------------------------------------------------------------------------------------------------------------------------------------------------------------------------------------------------------------------------------------------------------------------------------------------------------------------------------------------------------------------------|
| <p> <b>1 Very Fit</b> – People who are robust, active, energetic and motivated. These people commonly exercise regularly. They are among the fittest for their age.</p> <hr/> <p> <b>2 Well</b> – People who have <b>no active disease symptoms</b> but are less fit than category 1. Often, they exercise or are very <b>active occasionally</b>, e.g. seasonally.</p> <hr/> <p> <b>3 Managing Well</b> – People whose <b>medical problems are well controlled</b>, but are <b>not regularly active</b> beyond routine walking.</p> <hr/> <p> <b>4 Vulnerable</b> – While <b>not dependent</b> on others for daily help, often <b>symptoms limit activities</b>. A common complaint is being “slowed up”, and/or being tired during the day.</p> <hr/> <p> <b>5 Mildly Frail</b> – These people often have <b>more evident slowing</b>, and need help in <b>high order IADLs</b> (finances, transportation, heavy housework, medications). Typically, mild frailty progressively impairs shopping and walking outside alone, meal preparation and housework.</p> <hr/> <p> <b>6 Moderately Frail</b> – People need help with <b>all outside activities</b> and with <b>keeping house</b>. Inside, they often have problems with stairs and need <b>help with bathing</b> and might need minimal assistance (cuing, standby) with dressing.</p> | <p> <b>7 Severely Frail</b> – <b>Completely dependent for personal care</b>, from whatever cause (physical or cognitive). Even so, they seem stable and not at high risk of dying (within ~ 6 months).</p> <hr/> <p> <b>8 Very Severely Frail</b> – Completely dependent, approaching the end of life. Typically, they could not recover even from a minor illness.</p> <hr/> <p> <b>9. Terminally Ill</b> - Approaching the end of life. This category applies to people with a <b>life expectancy &lt;6 months</b>, who are <b>not otherwise evidently frail</b>.</p> |
|-------------------------------------------------------------------------------------------------------------------------------------------------------------------------------------------------------------------------------------------------------------------------------------------------------------------------------------------------------------------------------------------------------------------------------------------------------------------------------------------------------------------------------------------------------------------------------------------------------------------------------------------------------------------------------------------------------------------------------------------------------------------------------------------------------------------------------------------------------------------------------------------------------------------------------------------------------------------------------------------------------------------------------------------------------------------------------------------------------------------------------------------------------------------------------------------------------------------------------------------------------------------------------------------------------------------------------------------------------------------------------------------------------------------------------------------------------------------------------------------------------------------------------------------------------------------------------------------------------------------------------------------------------------------------------------------------------------------------------------------------------------------------------------------------------------------------------------------------------|----------------------------------------------------------------------------------------------------------------------------------------------------------------------------------------------------------------------------------------------------------------------------------------------------------------------------------------------------------------------------------------------------------------------------------------------------------------------------------------------------------------------------------------------------------------------------------------------------------------------------------------------------------------------------------------------------------------------------------------------------------------------------------------------------------------------------|

**Scoring frailty in people with dementia**

The degree of frailty corresponds to the degree of dementia. Common **symptoms in mild dementia** include forgetting the details of a recent event, though still remembering the event itself, repeating the same question/story and social withdrawal.

In **moderate dementia**, recent memory is very impaired, even though they seemingly can remember their past life events well. They can do personal care with prompting.

In **severe dementia**, they cannot do personal care without help.

\* 1. Canadian Study on Health & Aging, Revised 2008.  
2. K. Rockwood et al. A global clinical measure of fitness and frailty in elderly people. CMAJ 2005;173:489-495.

## STROBE Statement—checklist of items that should be included in reports of observational studies

|                           | <b>Item No.</b> | <b>Recommendation</b>                                                                               | <b>Page No.</b> | <b>Relevant text from manuscript</b>                                                                                                                                                                                                                                                                                                                                                                                                                                                                                                                                                                                                                                                                 |
|---------------------------|-----------------|-----------------------------------------------------------------------------------------------------|-----------------|------------------------------------------------------------------------------------------------------------------------------------------------------------------------------------------------------------------------------------------------------------------------------------------------------------------------------------------------------------------------------------------------------------------------------------------------------------------------------------------------------------------------------------------------------------------------------------------------------------------------------------------------------------------------------------------------------|
| <b>Title and abstract</b> | 1               | (a) Indicate the study's design with a commonly used term in the title or the abstract              | 4               | a cross-sectional study of a cohort                                                                                                                                                                                                                                                                                                                                                                                                                                                                                                                                                                                                                                                                  |
|                           |                 | (b) Provide in the abstract an informative and balanced summary of what was done and what was found | 4               | done                                                                                                                                                                                                                                                                                                                                                                                                                                                                                                                                                                                                                                                                                                 |
| <b>Introduction</b>       |                 |                                                                                                     | 6-7             |                                                                                                                                                                                                                                                                                                                                                                                                                                                                                                                                                                                                                                                                                                      |
| Background/rationale      | 2               | Explain the scientific background and rationale for the investigation being reported                | 6-7             | <p>... a large proportion of people experiencing frailty also have multimorbidity</p> <p>... Low socioeconomic status is associated with multimorbidity, health risks, poorer prognoses, and challenges in accessing equitable care.</p> <p>... Reliable screening tools for frailty are easy to use in primary care</p> <p>... Planning and evaluating programs in primary care designed to meet the needs of all frail older adults would be better guided with an understanding of how chronic disease patterns and social factors (socioeconomic status) intersect and are patterned across prefrail and frail states.</p> <p>... We found little evidence that examined the intersection of</p> |

1  
2  
3  
4  
5  
6  
7  
8  
9  
10  
11  
12  
13  
14  
15  
16  
17  
18  
19  
20  
21  
22  
23  
24  
25  
26  
27  
28  
29  
30  
31  
32  
33  
34  
35  
36  
37  
38  
39  
40  
41  
42  
43  
44  
45  
46

For peer review only

|                |   |                                                                                                  |   |                                                                                                                                                                                                                                                                                                                                                                                                         |
|----------------|---|--------------------------------------------------------------------------------------------------|---|---------------------------------------------------------------------------------------------------------------------------------------------------------------------------------------------------------------------------------------------------------------------------------------------------------------------------------------------------------------------------------------------------------|
|                |   |                                                                                                  |   | frailty, multimorbidity and socioeconomic status, and with this study, we sought to explore their relationship.                                                                                                                                                                                                                                                                                         |
| Objectives     | 3 | State specific objectives, including any prespecified hypotheses                                 | 7 | We hypothesized that patients with a greater number of chronic conditions, especially disabling conditions, and with lower socioeconomic status would be more likely to have a higher clinical frailty score. Our aim was to describe the distribution of frailty among older adult patients in primary care, and to describe association between chronic conditions, socioeconomic status and frailty. |
| <b>Methods</b> |   |                                                                                                  |   |                                                                                                                                                                                                                                                                                                                                                                                                         |
| Study design   | 4 | Present key elements of study design early in the paper                                          | 8 | We conducted a cross-sectional study of a cohort of older adults, created using electronic medical records from a primary care practice-based research network (PBRN). Clinical frailty assessments and neighbourhood income and deprivation data were linked to the patient’s clinical data available from their electronic medical records.                                                           |
| Setting        | 5 | Describe the setting, locations, and relevant dates, including periods of recruitment, exposure, | 8 | The MUSIC Network is a                                                                                                                                                                                                                                                                                                                                                                                  |

|                              |    |                                                                                                                                                                                                                                                                                                                                                                                                                                                                                                                                                                                                                                                                                                                    |       |                                                                                                                                                                                                                                                                                                                                              |
|------------------------------|----|--------------------------------------------------------------------------------------------------------------------------------------------------------------------------------------------------------------------------------------------------------------------------------------------------------------------------------------------------------------------------------------------------------------------------------------------------------------------------------------------------------------------------------------------------------------------------------------------------------------------------------------------------------------------------------------------------------------------|-------|----------------------------------------------------------------------------------------------------------------------------------------------------------------------------------------------------------------------------------------------------------------------------------------------------------------------------------------------|
|                              |    | follow-up, and data collection                                                                                                                                                                                                                                                                                                                                                                                                                                                                                                                                                                                                                                                                                     |       | PBRN in Hamilton, Ontario, Canada. Data holdings include a regularly updated, deidentified, longitudinal database containing primary care practice data. Patients aged 65 years or older, currently rostered (as of Jan2020) to family physicians of the MUSIC network subgroup described above, were eligible to be included in the cohort. |
| Participants                 | 6  | <p>(a) <i>Cohort study</i>—Give the eligibility criteria, and the sources and methods of selection of participants. Describe methods of follow-up</p> <p><i>Case-control study</i>—Give the eligibility criteria, and the sources and methods of case ascertainment and control selection. Give the rationale for the choice of cases and controls</p> <p><i>Cross-sectional study</i>—Give the eligibility criteria, and the sources and methods of selection of participants</p> <p>(b) <i>Cohort study</i>—For matched studies, give matching criteria and number of exposed and unexposed</p> <p><i>Case-control study</i>—For matched studies, give matching criteria and the number of controls per case</p> | 9     | The participating physicians' EMR was used to identify rostered patients over the age of 65 and who had attended a clinical encounter within the last 12 months.                                                                                                                                                                             |
| Variables                    | 7  | Clearly define all outcomes, exposures, predictors, potential confounders, and effect modifiers. Give diagnostic criteria, if applicable                                                                                                                                                                                                                                                                                                                                                                                                                                                                                                                                                                           | 11    | Variables include frailty score, socioeconomic status (income and deprivation score) and level of multimorbidity                                                                                                                                                                                                                             |
| Data sources/<br>measurement | 8* | For each variable of interest, give sources of data and details of methods of assessment (measurement). Describe comparability of assessment methods if there is more than one group                                                                                                                                                                                                                                                                                                                                                                                                                                                                                                                               | 11-12 | We described the distribution of patient demographic characteristics, frailty, chronic conditions, and SES variables using simple descriptive                                                                                                                                                                                                |



1  
2  
3  
4  
5  
6  
7  
8  
9  
10  
11  
12  
13  
14  
15  
16  
17  
18  
19  
20  
21  
22  
23  
24  
25  
26  
27  
28  
29  
30  
31  
32  
33  
34  
35  
36  
37  
38  
39  
40  
41  
42  
43  
44  
45  
46

For peer review only

analyses (means, median, frequencies and proportions, as appropriate)... We examined bivariate associations between frailty and other patient characteristics (demographics, multimorbidity and SES).

|      |   |                                                           |   |                                                                                                                                                                                                        |
|------|---|-----------------------------------------------------------|---|--------------------------------------------------------------------------------------------------------------------------------------------------------------------------------------------------------|
| Bias | 9 | Describe any efforts to address potential sources of bias | 9 | Physicians were asked to complete frailty assessments (selecting a CFS score between 1-9) of patients whom they felt confident that they could assess based on their overall knowledge of the patient. |
|------|---|-----------------------------------------------------------|---|--------------------------------------------------------------------------------------------------------------------------------------------------------------------------------------------------------|

|            |    |                                           |   |                                                                                                                                                                                                                                                                                                             |
|------------|----|-------------------------------------------|---|-------------------------------------------------------------------------------------------------------------------------------------------------------------------------------------------------------------------------------------------------------------------------------------------------------------|
| Study size | 10 | Explain how the study size was arrived at | 9 | The final cohort for this study included 2043 patients whose physician had assessed their frailty level and who had: 1) a postal code in Hamilton that could accurately be linked to neighbourhood level information (described below) and 2) accessible disease diagnoses through the MUSIC-PBRN database. |
|------------|----|-------------------------------------------|---|-------------------------------------------------------------------------------------------------------------------------------------------------------------------------------------------------------------------------------------------------------------------------------------------------------------|

Continued on next page

|                                                                                                                                                                                     |                        |    |                                                                                                                              |    |                                                                                                                                                                                                                                                                                                                                                                                                                                                                                                                                                                                                                                                                                                                                                                                                                                     |
|-------------------------------------------------------------------------------------------------------------------------------------------------------------------------------------|------------------------|----|------------------------------------------------------------------------------------------------------------------------------|----|-------------------------------------------------------------------------------------------------------------------------------------------------------------------------------------------------------------------------------------------------------------------------------------------------------------------------------------------------------------------------------------------------------------------------------------------------------------------------------------------------------------------------------------------------------------------------------------------------------------------------------------------------------------------------------------------------------------------------------------------------------------------------------------------------------------------------------------|
| 1<br>2<br>3<br>4<br>5<br>6<br>7<br>8<br>9<br>10<br>11<br>12<br>13<br>14<br>15<br>16<br>17<br>18<br>19<br>20<br>21<br>22<br>23<br>24<br>25<br>26<br>27<br>28<br>29<br>30<br>31<br>32 | Quantitative variables | 11 | Explain how quantitative variables were handled in the analyses. If applicable, describe which groupings were chosen and why | 11 | A review of the distribution of the CFS scores showed some score categories had very small numbers, therefore, for analysis purposes, we further grouped the cohort's frailty scores as low (scored 1-3), medium (scored 4-6), and high (scored 7-9). We examined bivariate associations between frailty and other patient characteristics (demographics, multimorbidity and SES). Age was categorized as 65-69, 70-74, 75-79, 80-84, 85-89 and > 90 years. Male and female captured sex groupings. Income quintiles included scores of 1 (lowest income) to 5 (highest income). Material deprivation quintiles included groupings of 1 (least deprived) to 5 (most deprived). The number of chronic conditions (disorders and risk factors) were grouped as 0, 1, 2-4, 5+ and categorized having 1 or more conditions versus none. |
| 33<br>34<br>35<br>36<br>37<br>38<br>39<br>40<br>41<br>42                                                                                                                            | Statistical methods    | 12 | (a) Describe all statistical methods, including those used to control for confounding                                        | 12 | We examined associations using Chi-square, and ANOVA as appropriate. Statistical significance was set at $\alpha < 0.05$ (two-tailed). The data were analyzed using IBM SPSS Statistics (Version 28) predictive analytics software.                                                                                                                                                                                                                                                                                                                                                                                                                                                                                                                                                                                                 |

|                  |     |                                                                                                                                                                                                   |           |                                                                                                                                                                                                                                                                                                             |
|------------------|-----|---------------------------------------------------------------------------------------------------------------------------------------------------------------------------------------------------|-----------|-------------------------------------------------------------------------------------------------------------------------------------------------------------------------------------------------------------------------------------------------------------------------------------------------------------|
|                  |     | (b) Describe any methods used to examine subgroups and interactions                                                                                                                               |           | Not applicable                                                                                                                                                                                                                                                                                              |
|                  |     | (c) Explain how missing data were addressed                                                                                                                                                       |           | Not applicable                                                                                                                                                                                                                                                                                              |
|                  |     | (d) Cohort study—If applicable, explain how loss to follow-up was addressed                                                                                                                       |           |                                                                                                                                                                                                                                                                                                             |
|                  |     | Case-control study—If applicable, explain how matching of cases and controls was addressed                                                                                                        |           |                                                                                                                                                                                                                                                                                                             |
|                  |     | Cross-sectional study—If applicable, describe analytical methods taking account of sampling strategy                                                                                              |           |                                                                                                                                                                                                                                                                                                             |
|                  |     | (e) Describe any sensitivity analyses                                                                                                                                                             |           | Not applicable                                                                                                                                                                                                                                                                                              |
| <b>Results</b>   |     |                                                                                                                                                                                                   |           |                                                                                                                                                                                                                                                                                                             |
| Participants     | 13* | (a) Report numbers of individuals at each stage of study—eg numbers potentially eligible, examined for eligibility, confirmed eligible, included in the study, completing follow-up, and analysed | 9         | The final cohort for this study included 2043 patients whose physician had assessed their frailty level and who had: 1) a postal code in Hamilton that could accurately be linked to neighbourhood level information (described below) and 2) accessible disease diagnoses through the MUSIC-PBRN database. |
|                  |     | (b) Give reasons for non-participation at each stage                                                                                                                                              |           | Provided above                                                                                                                                                                                                                                                                                              |
|                  |     | (c) Consider use of a flow diagram                                                                                                                                                                |           | Described textually                                                                                                                                                                                                                                                                                         |
| Descriptive data | 14* | (a) Give characteristics of study participants (eg demographic, clinical, social) and information on exposures and potential confounders                                                          | 12, 25-26 | The mean age of the patients (n= 2043) was 76 years (as of Feb 2020) and 60.5% (1235/2043) were female. Two-thirds of the patients (63.5%, 1296/2043) had two or more chronic conditions. And also Table 1.                                                                                                 |
|                  |     | (b) Indicate number of participants with missing data for each variable of interest                                                                                                               |           | None                                                                                                                                                                                                                                                                                                        |
|                  |     | (c) Cohort study—Summarise follow-up time (eg, average and total amount)                                                                                                                          | 9-10      | Rostered patients with recent encounters identified and physicians were asked to complete                                                                                                                                                                                                                   |

|              |     |                                                                                                                                                                                                              |              |                                                                                                                                                                                                                                |
|--------------|-----|--------------------------------------------------------------------------------------------------------------------------------------------------------------------------------------------------------------|--------------|--------------------------------------------------------------------------------------------------------------------------------------------------------------------------------------------------------------------------------|
|              |     |                                                                                                                                                                                                              |              | frailty assessments (selecting a CFS score between 1-9) ...Frailty scored patients were linked to current disease coded data in the EMR and to neighbourhood level income and deprivation data.                                |
| Outcome data | 15* | <i>Cohort study</i> —Report numbers of outcome events or summary measures over time                                                                                                                          | 13-14; 25-26 | We studies associations between frailty level, and demographic characteristics, socioeconomic status and multimorbidity and chronic conditions patterns. Summarized in Table 1.                                                |
|              |     | <i>Case-control study</i> —Report numbers in each exposure category, or summary measures of exposure                                                                                                         |              |                                                                                                                                                                                                                                |
|              |     | <i>Cross-sectional study</i> —Report numbers of outcome events or summary measures                                                                                                                           |              |                                                                                                                                                                                                                                |
| Main results | 16  | (a) Give unadjusted estimates and, if applicable, confounder-adjusted estimates and their precision (eg, 95% confidence interval). Make clear which confounders were adjusted for and why they were included |              | Not applicable                                                                                                                                                                                                                 |
|              |     | (b) Report category boundaries when continuous variables were categorized                                                                                                                                    | 11, 25-26    | Age categories: 65-69, 70-74, 75-79, 80-84, 85-89, > 90 y<br>The number of chronic conditions (disorders and risk factors) were grouped as 0, 1, 2-4, 5+ and categorized having 1 or more conditions versus none. See Table 1. |
|              |     | (c) If relevant, consider translating estimates of relative risk into absolute risk for a meaningful time period                                                                                             |              | Not applicable                                                                                                                                                                                                                 |

Continued on next page

1  
2  
3  
4  
5  
6  
7  
8  
9  
10  
11  
12  
13  
14  
15  
16  
17  
18  
19  
20  
21  
22  
23  
24  
25  
26  
27  
28  
29  
30  
31  
32  
33  
34  
35  
36  
37  
38  
39  
40  
41  
42  
43  
44  
45  
46

---

|                |    |                                                                                                |       |                                                                                                                                                                                                                                                                                                                                                                                                                                                                                                                                                           |
|----------------|----|------------------------------------------------------------------------------------------------|-------|-----------------------------------------------------------------------------------------------------------------------------------------------------------------------------------------------------------------------------------------------------------------------------------------------------------------------------------------------------------------------------------------------------------------------------------------------------------------------------------------------------------------------------------------------------------|
| Other analyses | 17 | Report other analyses done—eg analyses of subgroups and interactions, and sensitivity analyses | 11-12 | We grouped the cohort by frailty score as low (scored 1-3), medium (scored 4-6), and high (scored 7-9). Male and female captured sex groupings. Income quintiles included scores of 1 (lowest income) to 5 (highest income). Material deprivation quintiles included groupings of 1 (least deprived) to 5 (most deprived). We examined associations using Chi-square, and ANOVA as appropriate. Statistical significance was set at alpha<0.05 (two-tailed). The data were analyzed using IBM SPSS Statistics (Version 28) predictive analytics software. |
|----------------|----|------------------------------------------------------------------------------------------------|-------|-----------------------------------------------------------------------------------------------------------------------------------------------------------------------------------------------------------------------------------------------------------------------------------------------------------------------------------------------------------------------------------------------------------------------------------------------------------------------------------------------------------------------------------------------------------|

---

**Discussion**

|             |    |                                                          |       |                                                                                                                                                                                                                                                                                                                                                                                                                                                       |
|-------------|----|----------------------------------------------------------|-------|-------------------------------------------------------------------------------------------------------------------------------------------------------------------------------------------------------------------------------------------------------------------------------------------------------------------------------------------------------------------------------------------------------------------------------------------------------|
| Key results | 18 | Summarise key results with reference to study objectives | 12-14 | Two-thirds of the patients (63.5%, 1296/2043) had two or more chronic conditions. The distribution of income quintiles was significantly different across the frailty groups ( $\chi^2 = 61.42$ , $df=8$ , $p < 0.001$ ). The data show a trend of more multimorbidity burden in the high frail group (12%, 40%, 44% for 1, 2-3 and 5+ conditions), whereas the low frailty and medium frailty groups showed higher proportions in the 2-4 conditions |
|-------------|----|----------------------------------------------------------|-------|-------------------------------------------------------------------------------------------------------------------------------------------------------------------------------------------------------------------------------------------------------------------------------------------------------------------------------------------------------------------------------------------------------------------------------------------------------|

---

|                  |    |                                                                                                                                                                            |    |                                                                                                                                                                                                                                                                                                                                                                                                                                                                                                                                                                               |
|------------------|----|----------------------------------------------------------------------------------------------------------------------------------------------------------------------------|----|-------------------------------------------------------------------------------------------------------------------------------------------------------------------------------------------------------------------------------------------------------------------------------------------------------------------------------------------------------------------------------------------------------------------------------------------------------------------------------------------------------------------------------------------------------------------------------|
|                  |    |                                                                                                                                                                            |    | category (43% and 49% for low frailty and medium frailty, respectively) ( $p < 0.001$ ).                                                                                                                                                                                                                                                                                                                                                                                                                                                                                      |
| Limitations      | 19 | Discuss limitations of the study, taking into account sources of potential bias or imprecision. Discuss both direction and magnitude of any potential bias                 | 16 | As a cross-sectional study, we cannot deduce the direction of causation of the associations between socio-economic status, multimorbidity and level of frailty. We have assumed neighbourhood level income and deprivation status provide reasonable accuracy with respect to the actual socioeconomic status of individual patients within our frailty cohort. We limited the cohort to patients for whom a single dissemination area (DA) code mapped to their postal code. This affects sample size but there is no reason to think it would affect the associations found |
| Interpretation   | 20 | Give a cautious overall interpretation of results considering objectives, limitations, multiplicity of analyses, results from similar studies, and other relevant evidence | 17 | Awareness of the triple disadvantage of disease burden, frailty, and socioeconomic disadvantage, as well as specific disease patterns can support a health equity approach to care for older adults within primary care.                                                                                                                                                                                                                                                                                                                                                      |
| Generalisability | 21 | Discuss the generalisability (external validity) of the study results                                                                                                      | 17 | This study highlights the need to anticipate and fund targeted health and social care approaches for achieving improved health equity                                                                                                                                                                                                                                                                                                                                                                                                                                         |

1  
2  
3  
4  
5  
6  
7  
8  
9  
10  
11  
12  
13  
14  
15  
16  
17  
18  
19  
20  
21  
22  
23  
24  
25  
26  
27  
28  
29  
30  
31  
32  
33  
34  
35  
36  
37  
38  
39  
40  
41  
42  
43  
44  
45  
46

---

and doing this through primary care.

---

**Other information**

---

|         |    |                                                                                                                                                               |   |                                                                                                                             |
|---------|----|---------------------------------------------------------------------------------------------------------------------------------------------------------------|---|-----------------------------------------------------------------------------------------------------------------------------|
| Funding | 22 | Give the source of funding and the role of the funders for the present study and, if applicable, for the original study on which the present article is based | 3 | Funding source: INSPIRE-PHC Program, Applied Health Research Question, Ontario Ministry of Health: Total Funding: \$31,680. |
|---------|----|---------------------------------------------------------------------------------------------------------------------------------------------------------------|---|-----------------------------------------------------------------------------------------------------------------------------|

---

\*Give information separately for cases and controls in case-control studies and, if applicable, for exposed and unexposed groups in cohort and cross-sectional studies.

**Note:** An Explanation and Elaboration article discusses each checklist item and gives methodological background and published examples of transparent reporting. The STROBE checklist is best used in conjunction with this article (freely available on the Web sites of PLoS Medicine at <http://www.plosmedicine.org/>, Annals of Internal Medicine at <http://www.annals.org/>, and Epidemiology at <http://www.epidem.com/>). Information on the STROBE Initiative is available at [www.strobe-statement.org](http://www.strobe-statement.org).
